# Supplementary material for: Brain-derived neurotrophic factor serum levels in genetically isolated populations: gender-specific association with anxiety disorder subtypes but not with anxiety levels or Val66Met polymorphism
Source: PeerJ. 2015 Oct 29;3:e1252. doi: 10.7717/peerj.1252 (PMC4631459; doi:10.7717/peerj.1252)
Supplement: Supplemental Information 1 — The table represents the dataset used to perform the analysis of correlation between BDNF amount quantified in human sera. The data are structured as single line for single sample with the genetic park code, the village of origin, the BDNF quantification, the gender and the different anamnestic assessments (all other columns). [file peerj-03-1252-s001.xlsx]

## Sheet: Sheet1
Code	Village	BDNF	DIAGNOSE	GAD	PHOBIA_SP	PHOBIA_SC	PANIC_AGOR	PANIC	OCD	EDM	other	D_PRE	GAD_PRE	PHOBIA_SP_PRE	PHOBIA_SC_PRE	PAN_AGOR_PRE	PANIC_PRE	OCD_PRE	EDM_PRE	other_PRE	N_EPISODE	HAM_A	HAM_D	BPRS	GAF	FAMILIARITY	TAS_F1	TAS_F2	TAS_F3	TAS_TOT	NS1	NS2	NS3	NS4	NSTOT	HA1	HA2	HA3	HA4	HATOT	RD1	RD3	RD4	RDTOT	P	S1	S2	S3	S4
582004	SanMartino	18.79	0	0	0	0	0	0	0	0	0	0	0	0	0	0	0	0	0	0	0	0	0	18	90	0	14	11	18	43	5	4	7	2	18	8	7	6	5	26	7	3	1	11	4	6	4	4	8
582005	SanMartino	59.07	0	0	0	0	0	0	0	0	0	0	0	0	0	0	0	0	0	0	0	2	2	19	98	0	21	20	19	60	6	4	2	3	15	5	6	4	5	20	8	3	4	15	5	8	5	4	6
582008	SanMartino	23.34	0	0	0	0	0	0	0	0	0	0	0	0	0	0	0	0	0	0	0	0	0	18	92	0	17	19	22	58	6	9	4	5	24	5	1	4	1	11	4	1	3	8	5	6	4	5	5
582011	SanMartino	59.5	0	0	0	0	0	0	0	0	0	0	0	0	0	0	0	0	0	0	0	3	5	21	95	0	15	6	11	32	9	3	4	3	19	2	5	0	0	7	9	7	3	19	8	5	7	5	11
582012	SanMartino	32.21	0	0	0	0	0	0	0	0	0	0	0	0	0	0	0	0	0	0	0	1	0	18	90	0	7	5	17	29	NA	NA	NA	NA	NA	NA	NA	NA	NA	NA	NA	NA	NA	NA	NA	NA	NA	NA	NA
582015	SanMartino	40.59	0	0	0	0	0	0	0	0	0	0	0	0	0	0	0	0	0	0	0	4	6	23	100	0	14	9	16	39	5	6	4	8	23	1	5	0	1	7	7	8	5	20	3	8	8	5	9
582017	SanMartino	4.01	0	0	0	0	0	0	0	0	0	0	0	0	0	0	0	0	0	0	0	2	0	18	88	0	NA	NA	NA	NA	NA	NA	NA	NA	NA	NA	NA	NA	NA	NA	NA	NA	NA	NA	NA	NA	NA	NA	NA
582018	SanMartino	15.02	0	0	0	0	0	0	0	0	0	1	0	0	0	0	0	0	1	0	2	30	14	31	95	1	8	14	13	35	10	4	6	4	24	1	2	1	2	6	7	7	5	19	6	5	7	5	5
582020	SanMartino	28.16	0	0	0	0	0	0	0	0	0	0	0	0	0	0	0	0	0	0	0	3	1	20	90	0	7	13	22	42	6	0	5	3	14	2	2	4	0	8	7	8	4	19	5	6	6	4	5
582025	SanMartino	25.84	0	0	0	0	0	0	0	0	0	0	0	0	0	0	0	0	0	0	0	2	0	19	90	0	10	13	20	43	5	4	5	5	19	2	3	4	0	9	7	2	3	12	5	7	5	2	4
582026	SanMartino	37.88	0	0	0	0	0	0	0	0	0	0	0	0	0	0	0	0	0	0	0	7	4	22	81	0	NA	NA	NA	NA	NA	NA	NA	NA	NA	NA	NA	NA	NA	NA	NA	NA	NA	NA	NA	NA	NA	NA	NA
582027	SanMartino	31.11	0	0	0	0	0	0	0	0	0	0	0	0	0	0	0	0	0	0	0	2	1	20	90	0	10	7	17	34	9	5	6	6	26	2	1	0	0	3	8	6	5	19	4	5	2	5	9
582029	SanMartino	54.94	0	0	0	0	0	0	0	0	0	0	0	0	0	0	0	0	0	0	0	1	0	18	90	1	15	15	18	48	6	4	4	4	18	1	6	7	0	14	8	3	4	15	6	6	4	4	8
582030	SanMartino	16.51	0	0	0	0	0	0	0	0	0	0	0	0	0	0	0	0	0	0	0	4	4	31	85	0	9	6	20	35	7	3	3	8	21	5	4	3	3	15	7	3	3	13	3	8	2	3	6
582031	SanMartino	22.13	0	0	0	0	0	0	0	0	0	0	0	0	0	0	0	0	0	0	0	15	6	24	61	0	14	14	27	55	NA	NA	NA	NA	NA	NA	NA	NA	NA	NA	NA	NA	NA	NA	NA	NA	NA	NA	NA
582033	SanMartino	18.76	0	0	0	0	0	0	0	0	0	0	0	0	0	0	0	0	0	0	0	0	1	20	98	0	7	9	20	36	NA	NA	NA	NA	NA	NA	NA	NA	NA	NA	NA	NA	NA	NA	NA	NA	NA	NA	NA
582034	SanMartino	39.16	0	0	0	0	0	0	0	0	0	0	0	0	0	0	0	0	0	0	0	2	1	19	90	0	7	8	24	39	NA	NA	NA	NA	NA	NA	NA	NA	NA	NA	NA	NA	NA	NA	NA	NA	NA	NA	NA
582037	SanMartino	25.31	0	0	0	0	0	0	0	0	0	0	0	0	0	0	0	0	0	0	0	1	0	19	94	0	19	12	22	53	NA	NA	NA	NA	NA	NA	NA	NA	NA	NA	NA	NA	NA	NA	NA	NA	NA	NA	NA
582039	SanMartino	20.32	0	0	0	0	0	0	0	0	0	0	0	0	0	0	0	0	0	0	0	2	1	19	95	0	11	9	15	35	NA	NA	NA	NA	NA	NA	NA	NA	NA	NA	NA	NA	NA	NA	NA	NA	NA	NA	NA
582040	SanMartino	18.81	0	0	0	0	0	0	0	0	0	0	0	0	0	0	0	0	0	0	0	2	0	24	95	0	7	16	18	41	NA	NA	NA	NA	NA	NA	NA	NA	NA	NA	NA	NA	NA	NA	NA	NA	NA	NA	NA
582047	SanMartino	32.92	0	0	0	0	0	0	0	0	0	0	0	0	0	0	0	0	0	0	0	1	0	18	81	0	23	17	31	71	6	2	2	2	12	3	2	3	4	12	5	3	2	10	3	3	6	2	1
582051	SanMartino	23.91	0	0	0	0	0	0	0	0	0	1	0	0	0	0	0	0	1	0	1	4	0	21	92	0	21	24	26	71	3	6	6	8	23	6	4	4	4	18	1	1	2	4	2	7	5	3	5
582061	SanMartino	40.4	0	0	0	0	0	0	0	0	0	0	0	0	0	0	0	0	0	0	0	1	0	18	90	1	8	13	18	39	6	2	3	3	14	3	2	2	1	8	4	4	2	10	6	8	7	5	11
582068	SanMartino	34.57	0	0	0	0	0	0	0	0	0	1	0	0	0	0	0	0	1	0	1	3	3	21	95	0	NA	NA	NA	NA	NA	NA	NA	NA	NA	NA	NA	NA	NA	NA	NA	NA	NA	NA	NA	NA	NA	NA	NA
582069	SanMartino	42.32	0	0	0	0	0	0	0	0	0	0	0	0	0	0	0	0	0	0	0	4	0	20	95	0	10	10	23	43	5	7	2	5	19	7	5	3	1	16	4	1	2	7	7	1	7	4	6
582071	SanMartino	31.08	0	0	0	0	0	0	0	0	0	0	0	0	0	0	0	0	0	0	0	2	0	18	98	0	10	12	23	45	6	3	2	5	16	6	7	3	1	17	6	4	1	11	5	2	7	3	2
582072	SanMartino	40.73	0	0	0	0	0	0	0	0	0	1	1	0	0	0	0	0	0	0	1	6	3	26	81	0	25	17	16	58	NA	NA	NA	NA	NA	NA	NA	NA	NA	NA	NA	NA	NA	NA	NA	NA	NA	NA	NA
582080	SanMartino	30.76	0	0	0	0	0	0	0	0	0	0	0	0	0	0	0	0	0	0	0	0	0	18	90	1	NA	NA	NA	NA	NA	NA	NA	NA	NA	NA	NA	NA	NA	NA	NA	NA	NA	NA	NA	NA	NA	NA	NA
582082	SanMartino	32.62	0	0	0	0	0	0	0	0	0	0	0	0	0	0	0	0	0	0	0	1	0	18	92	0	11	19	25	55	NA	NA	NA	NA	NA	NA	NA	NA	NA	NA	NA	NA	NA	NA	NA	NA	NA	NA	NA
582091	SanMartino	17.51	0	0	0	0	0	0	0	0	0	0	0	0	0	0	0	0	0	0	0	0	0	18	90	0	10	12	23	45	5	4	3	3	15	5	3	2	2	12	4	4	5	13	6	7	6	5	3
582092	SanMartino	39.81	0	0	0	0	0	0	0	0	0	0	0	0	0	0	0	0	0	0	0	6	1	21	81	0	11	17	20	48	3	1	5	3	12	0	6	6	5	17	10	2	4	16	4	5	6	4	10
582096	SanMartino	25	0	0	0	0	0	0	0	0	0	0	0	0	0	0	0	0	0	0	0	2	0	20	85	0	26	18	26	70	NA	NA	NA	NA	NA	NA	NA	NA	NA	NA	NA	NA	NA	NA	NA	NA	NA	NA	NA
582098	SanMartino	31.69	0	0	0	0	0	0	0	0	0	0	0	0	0	0	0	0	0	0	0	5	3	22	90	0	13	10	19	42	1	4	2	1	8	4	6	7	4	21	6	2	4	12	4	8	7	3	10
582099	SanMartino	28	0	0	0	0	0	0	0	0	0	1	0	0	0	0	0	0	1	0	2	6	5	22	82	0	12	15	16	43	4	7	4	4	19	8	6	6	2	22	8	2	4	14	4	6	5	5	8
582101	SanMartino	27.34	0	0	0	0	0	0	0	0	0	0	0	0	0	0	0	0	0	0	0	2	2	22	88	0	23	16	20	59	NA	NA	NA	NA	NA	NA	NA	NA	NA	NA	NA	NA	NA	NA	NA	NA	NA	NA	NA
582105	ERTO	12.6	0	0	0	0	0	0	0	0	0	0	0	0	0	0	0	0	0	0	0	0	0	18	100	0	NA	NA	NA	NA	5	5	5	2	17	5	2	3	3	13	6	2	3	11	5	7	6	4	7
582107	ERTO	20.33	0	0	0	0	0	0	0	0	0	0	0	0	0	0	0	0	0	0	0	18	9	29	81	0	16	15	15	46	NA	NA	NA	NA	NA	NA	NA	NA	NA	NA	NA	NA	NA	NA	NA	NA	NA	NA	NA
582110	ERTO	12.81	0	0	0	0	0	0	0	0	0	1	1	0	0	0	0	0	0	0	1	0	0	18	100	0	14	16	23	53	4	4	4	3	15	6	7	2	4	19	5	5	2	12	4	7	5	5	9
582120	ERTO	31.68	0	0	0	0	0	0	0	0	0	0	0	0	0	0	0	0	0	0	0	0	0	23	100	0	NA	NA	NA	NA	9	8	7	6	30	0	0	1	1	2	2	2	2	6	4	8	6	5	4
582126	ERTO	32.22	0	0	0	0	0	0	0	0	0	0	0	0	0	0	0	0	0	0	0	0	0	18	100	0	22	18	29	69	7	9	9	7	32	4	1	1	1	7	6	6	4	16	4	3	3	1	3
582127	ERTO	32.31	0	0	0	0	0	0	0	0	0	0	0	0	0	0	0	0	0	0	0	0	0	18	100	0	12	13	20	45	7	4	6	4	21	7	7	5	4	23	4	4	4	12	4	5	4	3	7
582128	ERTO	21.32	0	0	0	0	0	0	0	0	0	1	0	0	0	0	1	0	1	0	4	16	9	32	91	1	27	15	25	67	NA	NA	NA	NA	NA	NA	NA	NA	NA	NA	NA	NA	NA	NA	NA	NA	NA	NA	NA
582131	ERTO	54.44	0	0	0	0	0	0	0	0	0	0	0	0	0	0	0	0	0	0	0	7	2	20	93	1	7	17	17	41	5	4	3	6	18	7	5	4	1	17	8	2	3	13	6	7	6	5	4
582132	ERTO	32.6	0	0	0	0	0	0	0	0	0	0	0	0	0	0	0	0	0	0	0	12	12	29	81	0	12	16	22	50	NA	NA	NA	NA	NA	NA	NA	NA	NA	NA	NA	NA	NA	NA	NA	NA	NA	NA	NA
582133	ERTO	52.76	0	0	0	0	0	0	0	0	0	0	0	0	0	0	0	0	0	0	0	6	6	24	100	0	22	15	18	55	6	2	5	4	17	3	1	1	2	7	6	6	3	15	3	5	6	5	8
582134	ERTO	49.41	0	0	0	0	0	0	0	0	0	0	0	0	0	0	0	0	0	0	0	0	0	18	100	0	15	13	24	52	6	3	3	7	19	3	1	3	2	9	5	5	1	11	2	5	5	4	2
582135	ERTO	40.56	0	0	0	0	0	0	0	0	0	1	0	0	0	0	1	0	0	0	3	0	0	18	100	0	7	8	20	35	4	3	3	3	13	6	6	0	3	15	8	3	2	13	5	4	4	3	8
582139	ERTO	19.4	0	0	0	0	0	0	0	0	0	0	0	0	0	0	0	0	0	0	0	0	0	18	100	0	14	9	20	43	5	1	1	2	9	1	2	1	0	4	6	6	2	14	7	6	7	5	8
582142	ERTO	27.77	0	0	0	0	0	0	0	0	0	0	0	0	0	0	0	0	0	0	0	0	0	18	100	0	7	5	25	37	2	3	2	3	10	3	4	3	2	12	5	4	2	11	4	6	6	5	11
582144	ERTO	31.36	0	0	0	0	0	0	0	0	0	0	0	0	0	0	0	0	0	0	0	0	0	18	100	0	10	8	15	33	NA	NA	NA	NA	NA	NA	NA	NA	NA	NA	NA	NA	NA	NA	NA	NA	NA	NA	NA
582146	ERTO	22.25	0	0	0	0	0	0	0	0	0	0	0	0	0	0	0	0	0	0	0	0	0	18	100	0	24	13	16	53	8	4	6	5	23	8	2	5	2	17	4	7	3	14	2	6	2	4	2
582154	ERTO	21.41	0	0	0	0	0	0	0	0	0	0	0	0	0	0	0	0	0	0	0	9	8	26	100	0	10	11	20	41	4	3	3	4	14	9	5	3	3	20	7	1	4	12	2	3	6	1	3
582157	ERTO	16.87	0	0	0	0	0	0	0	0	0	0	0	0	0	0	0	0	0	0	0	8	5	25	100	0	32	20	20	72	NA	NA	NA	NA	NA	NA	NA	NA	NA	NA	NA	NA	NA	NA	NA	NA	NA	NA	NA
582160	ERTO	18.83	0	0	0	0	0	0	0	0	0	0	0	0	0	0	0	0	0	0	0	0	0	18	100	0	10	18	26	54	10	6	7	6	29	2	3	0	3	8	7	5	4	16	4	4	4	4	5
582161	ERTO	27.69	0	0	0	0	0	0	0	0	0	0	0	0	0	0	0	0	0	0	0	0	0	18	100	0	8	12	24	44	8	2	6	4	20	3	6	5	3	17	4	8	5	17	4	8	6	5	8
582166	ERTO	44.47	0	0	0	0	0	0	0	0	0	1	0	0	0	0	0	0	1	0	1	8	9	22	85	0	19	14	20	53	3	4	7	4	18	9	6	8	6	29	8	3	3	14	5	5	5	5	10
582171	ERTO	23.41	0	0	0	0	0	0	0	0	0	1	0	0	0	0	0	0	1	0	1	4	2	18	85	0	19	12	27	58	4	4	3	2	13	4	6	5	4	19	5	2	3	10	4	6	6	2	7
582172	ERTO	9.99	0	0	0	0	0	0	0	0	0	0	0	0	0	0	0	0	0	0	0	2	3	18	91	1	6	1	4	11	4	6	1	4	15	1	5	4	2	12	5	3	2	10	5	6	5	4	8
582177	ERTO	10.94	0	0	0	0	0	0	0	0	0	0	0	0	0	0	0	0	0	0	0	4	1	21	82	0	11	12	22	45	4	3	6	5	18	8	6	3	2	19	4	2	3	9	2	4	4	0	8
582183	SanMartino	22.74	0	0	0	0	0	0	0	0	0	0	0	0	0	0	0	0	0	0	0	1	1	19	90	0	12	13	19	44	6	2	4	3	15	5	2	0	3	10	8	2	2	12	7	4	4	5	4
582198	SanMartino	50.97	0	0	0	0	0	0	0	0	0	0	0	0	0	0	0	0	0	0	0	1	0	18	98	0	NA	NA	NA	NA	NA	NA	NA	NA	NA	NA	NA	NA	NA	NA	NA	NA	NA	NA	NA	NA	NA	NA	NA
582199	SanMartino	22.07	0	0	0	0	0	0	0	0	0	0	0	0	0	0	0	0	0	0	0	6	7	22	90	0	13	12	19	44	8	4	7	6	25	2	2	2	0	6	7	4	5	16	6	8	5	5	6
582201	SanMartino	29.63	0	0	0	0	0	0	0	0	0	0	0	0	0	0	0	0	0	0	0	10	8	24	83	0	16	14	20	50	7	4	5	5	21	6	7	3	5	21	6	4	4	14	5	7	6	5	11
582202	SanMartino	29.1	0	0	0	0	0	0	0	0	0	0	0	0	0	0	0	0	0	0	0	0	0	18	100	0	13	11	24	48	6	8	5	7	26	5	1	3	2	11	4	6	1	11	4	4	7	4	6
582203	SanMartino	37.96	0	0	0	0	0	0	0	0	0	0	0	0	0	0	0	0	0	0	0	5	2	18	91	0	18	17	25	60	6	9	5	3	23	3	5	6	4	18	NA	NA	NA	13	0	NA	NA	NA	NA
582205	SanMartino	33.32	0	0	0	0	0	0	0	0	0	0	0	0	0	0	0	0	0	0	0	5	2	18	92	0	10	10	22	42	10	4	7	6	27	1	2	1	0	4	5	4	3	12	5	5	6	3	5
582206	SanMartino	11.72	0	0	0	0	0	0	0	0	0	0	0	0	0	0	0	0	0	0	0	13	8	29	70	0	16	12	22	50	1	5	4	4	14	5	7	6	4	22	6	4	3	13	5	7	6	5	7
582209	SanMartino	50.96	0	0	0	0	0	0	0	0	0	0	0	0	0	0	0	0	0	0	0	3	5	18	82	0	14	21	25	60	3	2	3	3	11	7	5	5	5	22	8	1	3	12	4	6	5	0	3
582228	SanMartino	28.36	0	0	0	0	0	0	0	0	0	0	0	0	0	0	0	0	0	0	0	16	6	26	81	0	26	13	24	63	5	5	7	3	20	6	6	6	5	23	8	8	4	20	3	5	2	1	7
582229	SanMartino	33.96	0	0	0	0	0	0	0	0	0	0	0	0	0	0	0	0	0	0	0	0	0	18	95	0	7	5	24	36	NA	NA	NA	NA	NA	NA	NA	NA	NA	NA	NA	NA	NA	NA	NA	NA	NA	NA	NA
582230	SanMartino	29.74	0	0	0	0	0	0	0	0	0	0	0	0	0	0	0	0	0	0	0	1	0	21	85	0	9	5	15	29	5	2	4	2	13	3	3	2	2	10	4	7	6	17	4	8	5	5	9
582231	SanMartino	27.06	0	0	0	0	0	0	0	0	0	0	0	0	0	0	0	0	0	0	0	3	1	27	82	0	18	9	24	51	9	5	6	7	27	2	4	1	1	8	7	7	3	17	3	8	7	5	10
582234	SanMartino	16.14	0	0	0	0	0	0	0	0	0	1	0	0	0	0	0	0	1	0	1	3	0	18	88	1	13	5	18	36	NA	NA	NA	NA	NA	NA	NA	NA	NA	NA	NA	NA	NA	NA	NA	NA	NA	NA	NA
582238	SanMartino	31.12	0	0	0	0	0	0	0	0	0	0	0	0	0	0	0	0	0	0	0	10	4	23	66	0	16	19	18	53	3	4	1	2	10	5	7	6	5	23	9	2	5	16	4	3	7	4	8
582240	SanMartino	31.21	0	0	0	0	0	0	0	0	0	0	0	0	0	0	0	0	0	0	0	6	4	33	81	1	16	15	29	60	NA	NA	NA	NA	NA	NA	NA	NA	NA	NA	NA	NA	NA	NA	NA	NA	NA	NA	NA
582245	SanMartino	32.95	0	0	0	0	0	0	0	0	0	0	0	0	0	0	0	0	0	0	0	5	2	26	85	0	7	13	19	39	7	4	5	5	21	0	3	0	1	4	5	6	2	13	5	7	7	4	7
582246	SanMartino	28.05	0	0	0	0	0	0	0	0	0	0	0	0	0	0	0	0	0	0	0	3	2	20	61	0	NA	NA	NA	NA	NA	NA	NA	NA	NA	NA	NA	NA	NA	NA	NA	NA	NA	NA	NA	NA	NA	NA	NA
582247	SanMartino	21.86	0	0	0	0	0	0	0	0	0	0	0	0	0	0	0	0	0	0	0	1	1	22	90	0	7	6	22	35	7	3	6	4	20	2	4	0	5	11	7	1	5	13	3	8	6	5	9
582249	SanMartino	19.4	0	0	0	0	0	0	0	0	0	0	0	0	0	0	0	0	0	0	0	0	0	18	90	0	7	10	28	45	3	7	4	2	16	3	3	6	1	13	5	8	2	15	0	6	4	3	5
582250	SanMartino	40.18	0	0	0	0	0	0	0	0	0	0	0	0	0	0	0	0	0	0	0	18	8	0	100	0	17	17	27	61	1	4	2	3	10	1	3	4	6	14	6	2	1	9	1	3	4	5	6
582256	SanMartino	31.98	0	0	0	0	0	0	0	0	0	0	0	0	0	0	0	0	0	0	0	0	4	27	100	0	NA	NA	NA	NA	NA	NA	NA	NA	NA	NA	NA	NA	NA	NA	NA	NA	NA	NA	NA	NA	NA	NA	NA
582259	SanMartino	54.96	0	0	0	0	0	0	0	0	0	0	0	0	0	0	0	0	0	0	0	0	0	18	90	0	20	15	20	55	5	3	4	2	14	7	3	3	3	16	6	6	2	14	4	6	6	5	7
582260	SanMartino	63.12	0	0	0	0	0	0	0	0	0	0	0	0	0	0	0	0	0	0	0	0	0	18	81	0	13	13	14	40	3	9	2	5	19	6	5	8	4	23	3	1	3	7	2	8	2	2	9
582266	SanMartino	56.1	0	0	0	0	0	0	0	0	0	0	0	0	0	0	0	0	0	0	0	1	2	18	55	0	22	9	25	56	3	4	5	1	13	4	6	6	4	20	5	4	6	15	6	6	4	1	4
582267	SanMartino	44.3	0	0	0	0	0	0	0	0	0	0	0	0	0	0	0	0	0	0	0	5	3	25	75	0	NA	NA	NA	NA	NA	NA	NA	NA	NA	NA	NA	NA	NA	NA	NA	NA	NA	NA	NA	NA	NA	NA	NA
582273	SanMartino	16.05	0	0	0	0	0	0	0	0	0	0	0	0	0	0	0	0	0	0	0	3	2	25	92	0	18	17	17	52	5	4	3	6	18	3	6	0	4	13	6	2	1	9	4	6	6	4	9
582274	SanMartino	40.32	0	0	0	0	0	0	0	0	0	1	0	0	0	0	0	0	1	0	1	4	4	20	75	0	28	15	25	68	NA	NA	NA	NA	NA	NA	NA	NA	NA	NA	NA	NA	NA	NA	NA	NA	NA	NA	NA
582276	SanMartino	35.24	0	0	0	0	0	0	0	0	0	0	0	0	0	0	0	0	0	0	0	2	1	18	85	0	21	14	29	64	8	4	4	4	20	7	6	3	7	23	9	5	2	16	5	5	4	1	1
582277	SanMartino	34.77	0	0	0	0	0	0	0	0	0	0	0	0	0	0	0	0	0	0	0	2	4	20	95	0	18	18	23	59	4	4	4	7	19	6	3	6	1	16	7	2	1	10	3	7	3	4	6
582279	SanMartino	47.29	0	0	0	0	0	0	0	0	0	0	0	0	0	0	0	0	0	0	0	2	1	20	85	0	17	14	18	49	NA	NA	NA	NA	NA	NA	NA	NA	NA	NA	NA	NA	NA	NA	NA	NA	NA	NA	NA
582283	SanMartino	42.45	0	0	0	0	0	0	0	0	0	0	0	0	0	0	0	0	0	0	0	0	0	18	100	0	13	14	23	50	7	3	6	6	22	5	4	4	6	19	4	4	5	13	4	8	4	5	6
582284	SanMartino	60.05	0	0	0	0	0	0	0	0	0	0	0	0	0	0	0	0	0	0	0	1	0	18	90	0	10	11	24	45	5	3	7	3	18	3	3	0	5	11	3	7	3	13	2	6	4	4	8
582285	SanMartino	59.82	0	0	0	0	0	0	0	0	0	0	0	0	0	0	0	0	0	0	0	0	0	18	90	0	7	9	24	40	4	3	6	2	15	4	7	3	2	16	6	2	4	12	5	7	5	4	11
582288	SanMartino	65.75	0	0	0	0	0	0	0	0	0	0	0	0	0	0	0	0	0	0	0	0	0	18	98	0	24	20	30	74	6	4	3	6	19	3	5	2	5	15	6	4	0	10	6	1	4	1	5
582289	SanMartino	37.49	0	0	0	0	0	0	0	0	0	0	0	0	0	0	0	0	0	0	0	5	2	20	95	0	13	14	19	46	8	3	6	6	23	3	6	4	3	16	6	6	4	16	4	8	6	4	8
582290	SanMartino	35.47	0	0	0	0	0	0	0	0	0	0	0	0	0	0	0	0	0	0	0	0	0	18	100	0	18	15	27	60	4	4	5	3	16	5	4	1	3	13	6	5	3	14	5	8	7	4	8
582295	SanMartino	54.46	0	0	0	0	0	0	0	0	0	0	0	0	0	0	0	0	0	0	0	8	8	27	88	0	NA	NA	NA	NA	NA	NA	NA	NA	NA	NA	NA	NA	NA	NA	NA	NA	NA	NA	NA	NA	NA	NA	NA
590449	Clauzetto	34.3	0	0	0	0	0	0	0	0	0	0	0	0	0	0	0	0	0	0	0	1	0	20	100	0	12	10	23	45	2	2	6	3	13	6	6	3	3	18	2	2	5	9	2	5	0	2	2
590452	Clauzetto	19.04	0	0	0	0	0	0	0	0	0	0	0	0	0	0	0	0	0	0	0	2	0	19	100	0	10	11	15	36	9	1	4	4	18	6	5	2	3	16	4	6	4	14	3	7	8	5	10
590457	Clauzetto	38.32	0	0	0	0	0	0	0	0	0	0	0	0	0	0	0	0	0	0	0	0	0	21	100	0	10	19	16	45	4	6	4	2	16	5	7	5	9	26	7	2	4	13	0	7	7	5	7
590463	Clauzetto	21.56	0	0	0	0	0	0	0	0	0	0	0	0	0	0	0	0	0	0	0	5	4	22	75	0	16	12	24	52	7	4	6	3	20	9	6	7	7	29	3	6	5	14	2	6	3	1	6
590464	Clauzetto	17.39	0	0	0	0	0	0	0	0	0	0	0	0	0	0	0	0	0	0	0	10	6	24	90	0	15	8	13	36	7	4	4	3	18	9	7	8	8	32	7	5	2	14	5	5	3	3	6
590475	Clauzetto	27.9	0	0	0	0	0	0	0	0	0	0	0	0	0	0	0	0	0	0	0	4	4	23	91	1	7	16	26	49	2	3	2	3	10	8	7	2	3	20	10	6	1	17	7	1	4	3	4
590477	Clauzetto	18.86	0	0	0	0	0	0	0	0	0	0	0	0	0	0	0	0	0	0	0	19	9	33	100	0	11	8	15	34	NA	NA	NA	NA	NA	NA	NA	NA	NA	NA	NA	NA	NA	NA	NA	NA	NA	NA	NA
590479	Clauzetto	18.47	0	0	0	0	0	0	0	0	0	0	0	0	0	0	0	0	0	0	0	18	9	36	100	0	19	19	32	70	NA	NA	NA	NA	NA	NA	NA	NA	NA	NA	NA	NA	NA	NA	NA	NA	NA	NA	NA
590482	Clauzetto	16.34	0	0	0	0	0	0	0	0	0	0	0	0	0	0	0	0	0	0	0	10	8	22	100	0	18	16	22	56	2	5	4	6	17	6	5	4	2	17	8	9	3	16	6	6	4	4	8
590483	Clauzetto	25.61	0	0	0	0	0	0	0	0	0	0	0	0	0	0	0	0	0	0	0	20	8	31	100	0	11	7	12	30	7	3	6	2	18	6	4	2	1	13	9	8	3	20	7	3	3	5	4
590489	Clauzetto	38.57	0	0	0	0	0	0	0	0	0	1	1	0	0	0	0	0	0	0	1	22	12	38	100	0	7	12	20	39	5	6	6	3	20	1	1	0	3	5	7	4	4	15	5	7	6	5	7
590492	Clauzetto	45.04	0	0	0	0	0	0	0	0	0	0	0	0	0	0	0	0	0	0	0	25	13	36	100	0	7	8	15	30	5	1	7	3	16	9	7	5	7	28	7	5	5	17	8	8	7	5	7
590497	Clauzetto	36.52	0	0	0	0	0	0	0	0	0	0	0	0	0	0	0	0	0	0	0	13	6	30	100	0	11	17	15	43	10	3	6	3	22	6	5	7	3	21	6	1	3	10	5	4	7	3	6
590504	Clauzetto	32.35	0	0	0	0	0	0	0	0	0	0	0	0	0	0	0	0	0	0	0	13	NA	23	90	0	8	8	28	44	9	6	6	3	24	2	4	2	4	12	3	5	4	12	4	8	6	5	11
590506	Clauzetto	23.84	0	0	0	0	0	0	0	0	0	0	0	0	0	0	0	0	0	0	0	12	4	24	100	0	11	18	19	48	NA	NA	NA	NA	NA	NA	NA	NA	NA	NA	NA	NA	NA	NA	NA	NA	NA	NA	NA
590507	Clauzetto	16.98	0	0	0	0	0	0	0	0	0	0	0	0	0	0	0	0	0	0	0	8	5	27	100	0	11	25	26	62	NA	NA	NA	NA	NA	NA	NA	NA	NA	NA	NA	NA	NA	NA	NA	NA	NA	NA	NA
590508	Clauzetto	22.82	0	0	0	0	0	0	0	0	0	0	0	0	0	0	0	0	0	0	0	11	5	29	100	0	10	12	12	34	9	4	5	4	22	2	4	5	2	13	5	3	2	10	3	7	7	5	11
590511	Clauzetto	22.68	0	0	0	0	0	0	0	0	0	1	0	0	0	0	0	0	1	1	3	14	10	34	100	0	11	16	13	40	6	2	4	3	15	5	3	7	0	15	7	3	3	13	8	6	6	5	2
590513	Clauzetto	21.59	0	0	0	0	0	0	0	0	0	0	0	0	0	0	0	0	0	0	0	7	3	24	100	0	10	19	14	43	1	2	1	2	6	3	4	3	2	12	3	2	4	9	7	8	7	5	9
590514	Clauzetto	20.74	0	0	0	0	0	0	0	0	0	0	0	0	0	0	0	0	0	0	0	0	0	18	100	0	7	5	17	29	7	2	6	3	18	5	5	1	2	13	9	8	3	20	6	3	4	5	4
590521	Clauzetto	20.46	0	0	0	0	0	0	0	0	0	0	0	0	0	0	0	0	0	0	0	29	14	38	91	0	23	25	24	72	3	2	4	2	11	6	6	8	1	21	6	0	3	9	4	3	1	1	4
590524	Clauzetto	53.11	0	0	0	0	0	0	0	0	0	0	0	0	0	0	0	0	0	0	0	4	2	19	100	0	14	23	26	63	0	1	3	2	6	3	7	7	1	18	9	1	3	13	3	6	3	0	9
590527	Clauzetto	16.78	0	0	0	0	0	0	0	0	0	0	0	0	0	0	0	0	0	0	0	17	7	24	100	0	7	18	16	41	NA	NA	NA	NA	NA	NA	NA	NA	NA	NA	NA	NA	NA	NA	NA	NA	NA	NA	NA
590529	Clauzetto	13.29	0	0	0	0	0	0	0	0	0	0	0	0	0	0	0	0	0	0	0	2	NA	21	100	0	7	5	16	28	7	0	5	2	14	1	3	2	1	7	4	6	4	14	6	8	7	5	10
590531	Clauzetto	25.1	0	0	0	0	0	0	0	0	0	0	0	0	0	0	0	0	0	0	0	14	6	26	100	0	21	8	20	49	3	2	5	1	11	7	5	7	6	25	9	6	2	17	5	7	4	3	6
590533	Clauzetto	16.71	0	0	0	0	0	0	0	0	0	0	0	0	0	0	0	0	0	0	0	13	6	26	100	0	7	9	22	38	6	3	4	2	15	3	5	3	5	16	5	6	2	13	3	4	5	5	6
590534	Clauzetto	11.45	0	0	0	0	0	0	0	0	0	0	0	0	0	0	0	0	0	0	0	18	10	36	100	0	16	13	16	45	NA	NA	NA	NA	NA	NA	NA	NA	NA	NA	NA	NA	NA	NA	NA	NA	NA	NA	NA
590535	Clauzetto	24.84	0	0	0	0	0	0	0	0	0	0	0	0	0	0	0	0	0	0	0	9	4	24	100	0	7	14	18	39	NA	NA	NA	NA	NA	NA	NA	NA	NA	NA	NA	NA	NA	NA	NA	NA	NA	NA	NA
590538	Clauzetto	23.35	0	0	0	0	0	0	0	0	0	1	0	0	0	0	0	0	1	0	1	26	18	41	100	0	10	15	21	46	8	0	4	2	14	7	2	1	1	11	6	6	3	15	5	3	7	5	3
590539	Clauzetto	29.94	0	0	0	0	0	0	0	0	0	1	0	0	0	0	0	0	1	0	1	15	7	30	100	0	10	9	16	35	NA	NA	NA	NA	NA	NA	NA	NA	NA	NA	NA	NA	NA	NA	NA	NA	NA	NA	NA
590541	Clauzetto	30.9	0	0	0	0	0	0	0	0	0	0	0	0	0	0	0	0	0	0	0	20	15	37	91	0	11	17	20	48	7	3	3	4	17	5	5	7	4	21	9	1	1	11	5	4	4	4	7
590542	Clauzetto	20.88	0	0	0	0	0	0	0	0	0	0	0	0	0	0	0	0	0	0	0	2	0	21	100	0	9	12	19	40	3	0	2	2	7	9	8	9	3	29	6	2	4	12	5	4	4	3	4
590543	Clauzetto	18.33	0	0	0	0	0	0	0	0	0	0	0	0	0	0	0	0	0	0	0	17	12	29	100	0	13	10	17	40	1	0	5	2	8	7	5	5	3	20	8	6	3	17	4	6	7	3	10
590545	Clauzetto	33.34	0	0	0	0	0	0	0	0	0	0	0	0	0	0	0	0	0	0	0	6	0	22	100	0	7	5	22	34	8	1	4	5	18	2	5	1	1	9	3	7	6	16	2	8	6	5	9
590546	Clauzetto	33.74	0	0	0	0	0	0	0	0	0	0	0	0	0	0	0	0	0	0	0	11	5	23	91	0	10	19	28	57	4	6	5	6	21	5	5	7	3	20	3	2	2	7	5	7	4	4	9
590553	Clauzetto	17.59	0	0	0	0	0	0	0	0	0	0	0	0	0	0	0	0	0	0	0	3	4	19	90	1	7	20	24	51	0	4	4	3	11	4	4	7	3	18	3	0	3	6	3	8	6	4	10
590554	Clauzetto	27.15	0	0	0	0	0	0	0	0	0	0	0	0	0	0	0	0	0	0	0	2	1	21	100	0	11	13	20	44	NA	NA	NA	NA	NA	NA	NA	NA	NA	NA	NA	NA	NA	NA	NA	NA	NA	NA	NA
590555	Clauzetto	28.47	0	0	0	0	0	0	0	0	0	1	0	0	0	0	0	0	1	0	2	6	3	21	85	0	22	21	22	65	4	3	2	4	13	3	1	6	1	11	8	4	3	15	8	3	4	5	4
590559	Clauzetto	41.77	0	0	0	0	0	0	0	0	0	0	0	0	0	0	0	0	0	0	0	10	10	24	82	0	15	7	11	33	9	1	7	6	23	9	4	7	1	21	8	6	5	19	7	7	6	4	6
590563	Clauzetto	25.14	0	0	0	0	0	0	0	0	0	1	0	0	0	0	0	0	1	0	1	2	0	19	85	0	12	13	25	50	NA	NA	NA	NA	NA	NA	NA	NA	NA	NA	NA	NA	NA	NA	NA	NA	NA	NA	NA
590565	Clauzetto	23.28	0	0	0	0	0	0	0	0	0	0	0	0	0	0	0	0	0	0	0	3	4	21	85	0	11	20	19	50	4	5	3	2	14	4	5	3	1	13	6	1	2	9	3	4	4	5	6
590566	Clauzetto	37.3	0	0	0	0	0	0	0	0	0	1	0	0	0	0	0	0	1	0	1	2	0	21	92	1	7	14	8	29	NA	NA	NA	NA	NA	NA	NA	NA	NA	NA	NA	NA	NA	NA	NA	NA	NA	NA	NA
590569	Clauzetto	38.04	0	0	0	0	0	0	0	0	0	0	0	0	0	0	0	0	0	0	0	1	0	20	100	0	9	5	11	25	6	1	2	5	14	1	1	0	0	2	7	4	1	12	8	5	6	5	5
590574	Clauzetto	36.6	0	0	0	0	0	0	0	0	0	0	0	0	0	0	0	0	0	0	0	2	0	18	95	0	7	5	31	43	7	3	3	5	18	7	2	5	4	18	2	5	3	10	5	6	4	4	8
590576	Clauzetto	21.31	0	0	0	0	0	0	0	0	0	0	0	0	0	0	0	0	0	0	0	19	7	26	95	0	7	5	26	38	NA	NA	NA	NA	NA	NA	NA	NA	NA	NA	NA	NA	NA	NA	NA	NA	NA	NA	NA
590577	Clauzetto	15.35	0	0	0	0	0	0	0	0	0	0	0	0	0	0	0	0	0	0	0	16	21	32	91	0	10	14	28	52	4	6	2	5	17	7	4	5	7	23	7	6	1	14	4	5	7	3	9
590582	Clauzetto	26.53	0	0	0	0	0	0	0	0	0	0	0	0	0	0	0	0	0	0	0	9	NA	26	85	0	18	19	21	58	3	3	2	1	9	8	6	5	4	23	8	4	1	13	4	4	4	0	6
590583	Clauzetto	12.71	0	0	0	0	0	0	0	0	0	0	0	0	0	0	0	0	0	0	0	11	NA	25	85	0	25	25	20	70	NA	NA	NA	NA	NA	NA	NA	NA	NA	NA	NA	NA	NA	NA	NA	NA	NA	NA	NA
590587	Clauzetto	16.17	0	0	0	0	0	0	0	0	0	0	0	0	0	0	0	0	0	0	0	2	NA	21	100	0	8	11	19	38	3	2	4	1	10	7	2	1	2	12	6	2	5	13	7	4	4	5	1
590588	Clauzetto	18	0	0	0	0	0	0	0	0	0	0	0	0	0	0	0	0	0	0	0	5	6	24	100	0	7	15	15	37	7	4	5	4	20	2	5	3	3	13	5	5	2	12	3	5	5	5	9
590590	Clauzetto	12.49	0	0	0	0	0	0	0	0	0	0	0	0	0	0	0	0	0	0	0	1	2	20	100	0	12	16	18	46	5	5	3	3	16	8	2	6	2	18	5	1	2	8	7	7	1	3	11
591040	Resia	6.65	0	0	0	0	0	0	0	0	0	0	0	0	0	0	0	0	0	0	0	7	3	21	100	0	11	5	12	28	7	4	4	4	19	7	3	2	5	17	5	6	4	15	5	7	6	5	8
591041	Resia	11.75	0	0	0	0	0	0	0	0	0	0	0	0	0	0	0	0	0	0	0	17	9	30	100	0	14	15	24	53	4	6	6	4	20	4	6	6	2	18	10	8	3	21	4	3	2	0	7
591057	Sauris	6.61	0	0	0	0	0	0	0	0	NA	1	0	0	0	0	0	0	1	NA	1	3	1	19	100	0	9	17	20	46	NA	NA	NA	NA	NA	NA	NA	NA	NA	NA	NA	NA	NA	NA	NA	NA	NA	NA	NA
591068	Sauris	19.22	0	0	0	0	0	0	0	0	NA	0	0	0	0	0	0	0	0	NA	0	0	0	18	95	0	7	4	21	32	8	8	5	4	25	1	2	1	1	5	4	6	4	14	5	8	6	5	11
591071	Sauris	40.33	0	0	0	0	0	0	0	0	NA	1	0	0	0	0	0	0	1	NA	1	3	0	18	95	0	17	21	22	60	4	6	5	4	19	6	4	7	7	24	6	2	5	13	2	4	3	3	10
591076	Sauris	18.78	0	0	0	0	0	0	0	0	NA	0	0	0	0	0	0	0	0	NA	0	3	0	21	82	0	9	15	17	41	8	7	6	6	27	5	2	7	6	20	1	1	1	5	2	6	5	5	2
591079	Sauris	25.09	0	0	0	0	0	0	0	0	NA	1	0	0	0	0	0	0	1	NA	1	6	8	25	75	0	17	15	22	54	5	3	5	6	19	6	5	6	6	23	6	5	1	12	4	2	5	1	2
591080	Sauris	41.37	0	0	0	0	0	0	0	0	NA	0	0	0	0	0	0	0	0	NA	0	0	3	18	91	0	9	17	22	48	NA	NA	NA	NA	NA	NA	NA	NA	NA	NA	NA	NA	NA	NA	NA	NA	NA	NA	NA
591082	Sauris	19.4	0	0	0	0	0	0	0	0	NA	0	0	0	0	0	0	0	0	NA	0	1	0	19	98	0	7	15	17	39	4	3	3	4	14	2	4	6	1	13	9	4	3	16	6	5	6	4	8
591088	Sauris	31.54	0	0	0	0	0	0	0	0	NA	0	0	0	0	0	0	0	0	NA	0	2	2	22	100	0	7	13	10	30	6	3	6	1	16	0	2	1	0	3	8	4	3	15	7	8	7	5	5
591093	Sauris	20.12	0	0	0	0	0	0	0	0	NA	0	0	0	0	0	0	0	0	NA	0	1	1	18	100	0	13	11	14	38	7	5	5	2	19	3	5	4	5	17	5	3	4	12	7	7	5	5	5
591102	Sauris	19.18	0	0	0	0	0	0	0	0	NA	0	0	0	0	0	0	0	0	NA	0	3	0	18	92	0	9	11	18	38	5	4	3	6	18	4	3	3	2	12	1	0	2	3	3	8	6	5	5
591115	Sauris	19.01	0	0	0	0	0	0	0	0	NA	0	0	0	0	0	0	0	0	NA	0	2	2	18	100	0	9	23	12	44	7	5	7	5	24	4	5	7	2	18	6	1	4	11	5	5	6	1	7
591118	Sauris	12.41	0	0	0	0	0	0	0	0	NA	0	0	0	0	0	0	0	0	NA	0	3	0	18	100	0	7	7	8	22	8	4	7	7	26	2	6	1	2	11	9	7	2	18	6	8	7	5	7
591119	Sauris	34.12	0	0	0	0	0	0	0	0	NA	0	0	0	0	0	0	0	0	NA	0	3	2	21	100	0	11	11	20	42	4	4	3	7	18	5	7	7	4	23	10	7	5	22	3	6	5	3	6
591522	Clauzetto	27.28	0	0	0	0	0	0	0	0	0	1	0	0	0	0	0	0	1	0	1	4	0	22	82	0	15	25	20	60	5	9	5	4	23	7	5	6	3	21	6	2	2	10	2	5	1	3	8
591527	Clauzetto	21.05	0	0	0	0	0	0	0	0	0	0	0	0	0	0	0	0	0	0	0	5	0	22	91	0	23	25	20	68	3	2	6	4	15	6	7	6	6	25	9	6	2	17	5	4	4	3	2
591529	Clauzetto	31.56	0	0	0	0	0	0	0	0	0	1	0	0	0	0	0	0	1	0	1	2	NA	21	90	1	25	23	15	63	NA	NA	NA	NA	NA	NA	NA	NA	NA	NA	NA	NA	NA	NA	NA	NA	NA	NA	NA
591531	Clauzetto	50.92	0	0	0	0	0	0	0	0	0	1	0	0	0	0	0	0	1	0	2	5	3	20	100	0	24	5	8	37	4	4	7	2	17	5	4	4	2	15	9	7	4	20	5	6	5	3	6
591532	Clauzetto	40.72	0	0	0	0	0	0	0	0	0	1	0	0	0	0	0	0	1	0	2	8	0	25	82	0	30	21	22	73	2	0	3	2	7	7	6	7	2	22	8	1	3	12	6	3	2	2	2
591535	Clauzetto	27.8	0	0	0	0	0	0	0	0	0	0	0	0	0	0	0	0	0	0	0	0	NA	18	100	0	12	16	21	49	NA	NA	NA	NA	NA	NA	NA	NA	NA	NA	NA	NA	NA	NA	NA	NA	NA	NA	NA
591537	Clauzetto	32.56	0	0	0	0	0	0	0	0	0	1	0	0	0	0	0	0	1	1	1	2	NA	22	95	0	10	14	23	47	NA	NA	NA	NA	NA	NA	NA	NA	NA	NA	NA	NA	NA	NA	NA	NA	NA	NA	NA
591538	Clauzetto	22.68	0	0	0	0	0	0	0	0	0	1	0	0	0	0	0	0	1	0	1	3	NA	18	95	1	11	18	24	53	NA	NA	NA	NA	NA	NA	NA	NA	NA	NA	NA	NA	NA	NA	NA	NA	NA	NA	NA
591544	Clauzetto	21.15	0	0	0	0	0	0	0	0	0	0	0	0	0	0	0	0	0	0	0	9	NA	28	95	0	7	9	16	32	NA	NA	NA	NA	NA	NA	NA	NA	NA	NA	NA	NA	NA	NA	NA	NA	NA	NA	NA
591557	Clauzetto	19.04	0	0	0	0	0	0	0	0	0	1	0	0	0	0	0	0	1	0	1	11	NA	24	90	0	31	10	28	69	NA	NA	NA	NA	NA	NA	NA	NA	NA	NA	NA	NA	NA	NA	NA	NA	NA	NA	NA
591561	Clauzetto	24.75	0	0	0	0	0	0	0	0	0	0	0	0	0	0	0	0	0	0	0	3	NA	20	100	0	10	10	17	37	NA	NA	NA	NA	NA	NA	NA	NA	NA	NA	NA	NA	NA	NA	NA	NA	NA	NA	NA
591564	Clauzetto	20.32	0	0	0	0	0	0	0	0	0	0	0	0	0	0	0	0	0	0	0	30	20	29	81	0	25	21	29	75	7	4	6	6	23	2	3	3	1	9	4	2	4	10	5	5	6	5	3
591566	Clauzetto	22.06	0	0	0	0	0	0	0	0	0	0	0	0	0	0	0	0	0	0	0	0	NA	18	91	0	13	5	13	31	NA	NA	NA	NA	NA	NA	NA	NA	NA	NA	NA	NA	NA	NA	NA	NA	NA	NA	NA
591575	Clauzetto	22.73	0	0	0	0	0	0	0	0	0	0	0	0	0	0	0	0	0	0	0	6	NA	24	90	0	27	16	18	61	NA	NA	NA	NA	NA	NA	NA	NA	NA	NA	NA	NA	NA	NA	NA	NA	NA	NA	NA
591576	Clauzetto	45.38	0	0	0	0	0	0	0	0	0	0	0	0	0	0	0	0	0	0	0	4	NA	26	100	1	11	8	14	33	NA	NA	NA	NA	NA	NA	NA	NA	NA	NA	NA	NA	NA	NA	NA	NA	NA	NA	NA
591577	Clauzetto	18.35	0	0	0	0	0	0	0	0	0	0	0	0	0	0	0	0	0	0	0	0	NA	18	100	0	8	10	12	30	NA	NA	NA	NA	NA	NA	NA	NA	NA	NA	NA	NA	NA	NA	NA	NA	NA	NA	NA
591582	Clauzetto	28.68	0	0	0	0	0	0	0	0	0	0	0	0	0	0	0	0	0	0	0	2	NA	18	100	1	10	11	20	41	NA	NA	NA	NA	NA	NA	NA	NA	NA	NA	NA	NA	NA	NA	NA	NA	NA	NA	NA
591584	Clauzetto	26.03	0	0	0	0	0	0	0	0	0	0	0	0	0	0	0	0	0	0	0	1	NA	18	100	0	11	5	10	26	NA	NA	NA	NA	NA	NA	NA	NA	NA	NA	NA	NA	NA	NA	NA	NA	NA	NA	NA
591591	Sauris	32.25	0	0	0	0	0	0	0	0	NA	0	0	0	0	0	0	0	0	NA	0	1	2	18	100	0	10	11	15	36	NA	NA	NA	NA	NA	NA	NA	NA	NA	NA	NA	NA	NA	NA	NA	NA	NA	NA	NA
591594	Sauris	61.61	0	0	0	0	0	0	0	0	NA	1	1	0	0	0	0	0	0	NA	1	2	1	19	90	0	30	21	25	76	5	3	3	2	13	6	5	6	3	20	7	1	2	10	5	5	2	1	6
591597	Sauris	19.5	0	0	0	0	0	0	0	0	NA	0	0	0	0	0	0	0	0	NA	0	1	0	18	100	0	10	12	12	34	NA	NA	NA	NA	NA	NA	NA	NA	NA	NA	NA	NA	NA	NA	NA	NA	NA	NA	NA
591598	Sauris	28.67	0	0	0	0	0	0	0	0	NA	0	0	0	0	0	0	0	0	NA	0	0	0	18	100	0	19	25	20	64	NA	NA	NA	NA	NA	NA	NA	NA	NA	NA	NA	NA	NA	NA	NA	NA	NA	NA	NA
591605	Sauris	6.13	0	0	0	0	0	0	0	0	NA	0	0	0	0	0	0	0	0	NA	0	2	1	18	91	0	20	24	21	65	NA	NA	NA	NA	NA	NA	NA	NA	NA	NA	NA	NA	NA	NA	NA	NA	NA	NA	NA
591606	Sauris	33.74	0	0	0	0	0	0	0	0	NA	0	0	0	0	0	0	0	0	NA	0	1	1	22	91	0	27	21	16	64	NA	NA	NA	NA	NA	NA	NA	NA	NA	NA	NA	NA	NA	NA	NA	NA	NA	NA	NA
591607	Sauris	34.04	0	0	0	0	0	0	0	0	NA	0	0	0	0	0	0	0	0	NA	0	0	0	18	100	0	8	6	12	26	NA	NA	NA	NA	NA	NA	NA	NA	NA	NA	NA	NA	NA	NA	NA	NA	NA	NA	NA
591608	Sauris	28.63	0	0	0	0	0	0	0	0	NA	0	0	0	0	0	0	0	0	NA	0	4	3	18	100	0	23	17	21	61	8	5	3	4	20	9	6	4	3	22	4	8	4	16	3	7	5	3	4
591613	Sauris	15.38	0	0	0	0	0	0	0	0	NA	1	0	0	0	0	0	0	1	NA	1	9	9	27	81	1	22	13	18	53	NA	NA	NA	NA	NA	NA	NA	NA	NA	NA	NA	NA	NA	NA	NA	NA	NA	NA	NA
591614	Sauris	11.18	0	0	0	0	0	0	0	0	NA	0	0	0	0	0	0	0	0	NA	0	2	2	18	100	0	20	19	24	63	NA	NA	NA	NA	NA	NA	NA	NA	NA	NA	NA	NA	NA	NA	NA	NA	NA	NA	NA
591616	Sauris	9.55	0	0	0	0	0	0	0	0	NA	0	0	0	0	0	0	0	0	NA	0	0	0	18	100	0	17	15	22	54	5	3	6	2	16	5	7	6	4	22	8	3	5	16	2	5	5	5	10
591627	Sauris	30.74	0	0	0	0	0	0	0	0	NA	1	0	0	0	0	1	0	0	NA	2	0	0	18	100	0	34	19	26	79	6	4	4	4	18	8	6	6	7	27	6	0	3	9	3	6	3	1	6
591633	Sauris	28.56	0	0	0	0	0	0	0	0	NA	0	0	0	0	0	0	0	0	NA	0	0	0	18	100	0	14	13	12	39	8	5	3	6	22	3	5	2	1	11	5	7	4	16	5	6	6	5	11
591639	Sauris	24.25	0	0	0	0	0	0	0	0	NA	1	0	0	0	0	0	0	1	NA	1	7	8	21	81	0	27	25	11	63	7	4	5	3	19	7	4	6	1	18	8	4	6	18	6	5	4	2	11
591643	Sauris	9.12	0	0	0	0	0	0	0	0	NA	0	0	0	0	0	0	0	0	NA	0	0	2	18	100	0	13	16	18	47	7	8	5	5	25	2	0	5	3	10	5	3	4	12	4	6	7	5	9
591645	Sauris	29.6	0	0	0	0	0	0	0	0	NA	0	0	0	0	0	0	0	0	NA	0	0	0	18	97	0	12	10	16	38	NA	NA	NA	NA	NA	NA	NA	NA	NA	NA	NA	NA	NA	NA	NA	NA	NA	NA	NA
591650	Sauris	20.79	0	0	0	0	0	0	0	0	NA	0	0	0	0	0	0	0	0	NA	0	0	0	18	100	0	10	16	19	45	NA	NA	NA	NA	NA	NA	NA	NA	NA	NA	NA	NA	NA	NA	NA	NA	NA	NA	NA
591651	Sauris	27.97	0	0	0	0	0	0	0	0	NA	1	1	0	0	0	0	0	0	NA	1	16	13	24	81	1	18	8	12	38	NA	NA	NA	NA	NA	NA	NA	NA	NA	NA	NA	NA	NA	NA	NA	NA	NA	NA	NA
591653	Sauris	20.01	0	0	0	0	0	0	0	0	NA	0	0	0	0	0	0	0	0	NA	0	2	2	18	100	0	20	6	14	40	8	8	5	7	28	8	4	2	4	18	10	6	4	20	4	6	4	5	7
591660	Resia	23.84	0	0	0	0	0	0	0	0	0	0	0	0	0	0	0	0	0	0	0	22	12	34	100	1	7	9	8	24	NA	NA	NA	NA	NA	NA	NA	NA	NA	NA	NA	NA	NA	NA	NA	NA	NA	NA	NA
591673	Resia	16.41	0	0	0	0	0	0	0	0	0	0	0	0	0	0	0	0	0	0	0	14	9	25	100	1	10	5	20	35	NA	NA	NA	NA	NA	NA	NA	NA	NA	NA	NA	NA	NA	NA	NA	NA	NA	NA	NA
591698	Resia	18.08	0	0	0	0	0	0	0	0	0	0	0	0	0	0	0	0	0	0	0	6	1	22	100	0	10	8	21	39	NA	NA	NA	NA	NA	NA	NA	NA	NA	NA	NA	NA	NA	NA	NA	NA	NA	NA	NA
593503	ERTO	31.57	0	0	0	0	0	0	0	0	0	0	0	0	0	0	0	0	0	0	0	2	2	18	90	0	15	23	16	54	5	2	5	0	12	3	4	5	0	12	6	2	3	11	7	8	6	5	11
593512	ERTO	27.61	0	0	0	0	0	0	0	0	0	0	0	0	0	0	0	0	0	0	0	13	NA	22	90	1	19	22	17	58	0	4	2	1	7	5	5	6	1	17	9	2	4	15	7	3	5	5	6
593519	ERTO	21.55	0	0	0	0	0	0	0	0	0	0	0	0	0	0	0	0	0	0	0	9	2	21	51	0	18	13	16	47	7	7	6	5	25	2	3	3	2	10	7	7	5	19	1	6	2	3	3
593562	Resia	50.54	0	0	0	0	0	0	0	0	0	0	0	0	0	0	0	0	0	0	0	2	0	18	100	0	8	9	14	31	NA	NA	NA	NA	NA	NA	NA	NA	NA	NA	NA	NA	NA	NA	NA	NA	NA	NA	NA
593563	Resia	59.6	0	0	0	0	0	0	0	0	0	0	0	0	0	0	0	0	0	0	0	0	2	20	85	0	14	13	22	49	NA	NA	NA	NA	NA	NA	NA	NA	NA	NA	NA	NA	NA	NA	NA	NA	NA	NA	NA
593564	Resia	8.52	0	0	0	0	0	0	0	0	0	0	0	0	0	0	0	0	0	0	0	9	6	26	91	0	15	25	25	65	NA	NA	NA	NA	NA	NA	NA	NA	NA	NA	NA	NA	NA	NA	NA	NA	NA	NA	NA
593565	Resia	26.35	0	0	0	0	0	0	0	0	0	0	0	0	0	0	0	0	0	0	0	2	0	18	95	0	11	11	18	40	NA	NA	NA	NA	NA	NA	NA	NA	NA	NA	NA	NA	NA	NA	NA	NA	NA	NA	NA
593573	Resia	25.4	0	0	0	0	0	0	0	0	0	0	0	0	0	0	0	0	0	0	0	9	3	20	100	0	9	9	10	28	NA	NA	NA	NA	NA	NA	NA	NA	NA	NA	NA	NA	NA	NA	NA	NA	NA	NA	NA
593577	Resia	22.41	0	0	0	0	0	0	0	0	0	1	0	0	0	0	0	0	0	1	0	0	1	20	90	1	20	12	20	52	3	4	5	2	14	4	5	3	2	14	7	4	4	15	4	3	0	2	3
593579	Resia	56.06	0	0	0	0	0	0	0	0	0	0	0	0	0	0	0	0	0	0	0	5	0	18	100	0	7	12	19	38	NA	NA	NA	NA	NA	NA	NA	NA	NA	NA	NA	NA	NA	NA	NA	NA	NA	NA	NA
593603	Resia	29.95	0	0	0	0	0	0	0	0	0	0	0	0	0	0	0	0	0	0	0	7	4	20	100	0	7	6	18	31	NA	NA	NA	NA	NA	NA	NA	NA	NA	NA	NA	NA	NA	NA	NA	NA	NA	NA	NA
593604	Resia	38.11	0	0	0	0	0	0	0	0	0	0	0	0	0	0	0	0	0	0	0	6	4	20	98	0	11	20	32	63	NA	NA	NA	NA	NA	NA	NA	NA	NA	NA	NA	NA	NA	NA	NA	NA	NA	NA	NA
593614	Resia	8.38	0	0	0	0	0	0	0	0	0	0	0	0	0	0	0	0	0	0	0	2	1	19	100	0	7	19	16	42	1	3	0	2	6	0	0	0	0	0	2	1	0	3	1	1	2	1	3
593615	Resia	48.67	0	0	0	0	0	0	0	0	0	0	0	0	0	0	0	0	0	0	0	1	0	18	90	0	29	13	33	75	NA	NA	NA	NA	NA	NA	NA	NA	NA	NA	NA	NA	NA	NA	NA	NA	NA	NA	NA
593624	Resia	12.89	0	0	0	0	0	0	0	0	0	0	0	0	0	0	0	0	0	0	0	1	1	18	90	0	11	16	21	48	NA	NA	NA	NA	NA	NA	NA	NA	NA	NA	NA	NA	NA	NA	NA	NA	NA	NA	NA
593631	Resia	16.33	0	0	0	0	0	0	0	0	0	1	0	0	0	0	1	0	0	0	1	16	12	25	91	1	7	9	9	25	NA	NA	NA	NA	NA	NA	NA	NA	NA	NA	NA	NA	NA	NA	NA	NA	NA	NA	NA
593648	Resia	29.09	0	0	0	0	0	0	0	0	0	0	0	0	0	0	0	0	0	0	0	3	3	26	100	0	9	13	18	40	NA	NA	NA	NA	NA	NA	NA	NA	NA	NA	NA	NA	NA	NA	NA	NA	NA	NA	NA
593650	Resia	32.48	0	0	0	0	0	0	0	0	0	1	0	0	0	0	0	0	0	1	1	5	5	20	82	0	30	13	18	61	NA	NA	NA	NA	NA	NA	NA	NA	NA	NA	NA	NA	NA	NA	NA	NA	NA	NA	NA
593666	Resia	37.29	0	0	0	0	0	0	0	0	0	0	0	0	0	0	0	0	0	0	0	2	1	18	90	0	8	9	23	40	NA	NA	NA	NA	NA	NA	NA	NA	NA	NA	NA	NA	NA	NA	NA	NA	NA	NA	NA
593667	Resia	21.2	0	0	0	0	0	0	0	0	0	0	0	0	0	0	0	0	0	0	0	0	0	18	90	1	7	9	19	35	NA	NA	NA	NA	NA	NA	NA	NA	NA	NA	NA	NA	NA	NA	NA	NA	NA	NA	NA
593671	Resia	17.04	0	0	0	0	0	0	0	0	0	0	0	0	0	0	0	0	0	0	0	8	5	25	100	1	7	9	19	35	NA	NA	NA	NA	NA	NA	NA	NA	NA	NA	NA	NA	NA	NA	NA	NA	NA	NA	NA
593674	Resia	53.58	0	0	0	0	0	0	0	0	0	1	0	0	0	0	0	0	1	0	1	24	18	31	91	0	13	14	17	44	NA	NA	NA	NA	NA	NA	NA	NA	NA	NA	NA	NA	NA	NA	NA	NA	NA	NA	NA
593682	Resia	41.56	0	0	0	0	0	0	0	0	0	0	0	0	0	0	0	0	0	0	0	8	6	23	100	1	7	13	13	33	NA	NA	NA	NA	NA	NA	NA	NA	NA	NA	NA	NA	NA	NA	NA	NA	NA	NA	NA
593688	Resia	6.39	0	0	0	0	0	0	0	0	0	0	0	0	0	0	0	0	0	0	0	1	0	21	100	0	17	15	13	45	NA	NA	NA	NA	NA	NA	NA	NA	NA	NA	NA	NA	NA	NA	NA	NA	NA	NA	NA
593725	Resia	16.49	0	0	0	0	0	0	0	0	0	0	0	0	0	0	0	0	0	0	0	1	0	18	90	0	7	19	12	38	NA	NA	NA	NA	NA	NA	NA	NA	NA	NA	NA	NA	NA	NA	NA	NA	NA	NA	NA
593726	Resia	25.6	0	0	0	0	0	0	0	0	0	0	0	0	0	0	0	0	0	0	0	5	7	19	81	0	27	15	19	61	NA	NA	NA	NA	NA	NA	NA	NA	NA	NA	NA	NA	NA	NA	NA	NA	NA	NA	NA
594849	Illegio	16.94	0	0	0	0	0	0	0	0	0	0	0	0	0	0	0	0	0	0	0	0	0	18	95	0	13	6	20	39	6	3	2	1	12	5	7	4	1	17	8	5	1	14	3	7	6	5	11
594851	Illegio	14.73	0	0	0	0	0	0	0	0	0	0	0	0	0	0	0	0	0	0	0	0	0	18	100	0	10	13	20	43	NA	NA	NA	NA	NA	NA	NA	NA	NA	NA	NA	NA	NA	NA	NA	NA	NA	NA	NA
594853	Illegio	16.77	0	0	0	0	0	0	0	0	0	0	0	0	0	0	0	0	0	0	0	2	1	18	90	0	12	17	23	52	4	2	4	1	11	1	4	6	4	15	3	2	3	8	2	8	8	5	8
594857	Illegio	15.21	0	0	0	0	0	0	0	0	0	1	1	0	0	0	0	0	0	0	0	2	4	23	90	0	15	11	23	49	8	4	6	5	23	2	6	2	3	13	6	7	4	17	4	7	7	4	11
594858	Illegio	12.91	0	0	0	0	0	0	0	0	0	0	0	0	0	0	0	0	0	0	0	0	1	18	90	1	10	9	19	38	6	3	2	5	16	1	2	1	2	6	8	5	4	17	3	8	6	5	8
594869	Illegio	23.1	0	0	0	0	0	0	0	0	0	0	0	0	0	0	0	0	0	0	0	0	0	18	100	0	11	16	26	53	NA	NA	NA	NA	NA	NA	NA	NA	NA	NA	NA	NA	NA	NA	NA	NA	NA	NA	NA
594878	Illegio	20.11	0	0	0	0	0	0	0	0	0	0	0	0	0	0	0	0	0	0	0	0	0	18	90	1	15	12	25	52	3	6	3	2	14	3	5	2	1	11	2	3	3	8	4	5	3	5	5
594879	Illegio	19.02	0	0	0	0	0	0	0	0	0	0	0	0	0	0	0	0	0	0	0	0	0	18	91	0	22	13	28	63	NA	NA	NA	NA	NA	NA	NA	NA	NA	NA	NA	NA	NA	NA	NA	NA	NA	NA	NA
594880	Illegio	17.56	0	0	0	0	0	0	0	0	0	1	1	0	0	0	0	0	0	0	1	5	5	22	85	1	10	8	16	34	NA	NA	NA	NA	NA	NA	NA	NA	NA	NA	NA	NA	NA	NA	NA	NA	NA	NA	NA
594884	Illegio	37.26	0	0	0	0	0	0	0	0	0	1	1	0	0	0	0	0	0	0	1	1	0	18	75	0	14	14	23	51	NA	NA	NA	NA	NA	NA	NA	NA	NA	NA	NA	NA	NA	NA	NA	NA	NA	NA	NA
594889	Illegio	22.83	0	0	0	0	0	0	0	0	0	0	0	0	0	0	0	0	0	0	0	0	1	18	90	1	10	9	21	40	8	4	5	2	19	9	3	2	1	15	4	7	3	14	4	6	4	4	1
594890	Illegio	14.71	0	0	0	0	0	0	0	0	0	0	0	0	0	0	0	0	0	0	0	2	1	19	70	0	14	15	22	51	NA	NA	NA	NA	NA	NA	NA	NA	NA	NA	NA	NA	NA	NA	NA	NA	NA	NA	NA
594892	Illegio	20.9	0	0	0	0	0	0	0	0	0	0	0	0	0	0	0	0	0	0	0	2	1	32	70	1	11	17	20	48	NA	NA	NA	NA	NA	NA	NA	NA	NA	NA	NA	NA	NA	NA	NA	NA	NA	NA	NA
594893	Illegio	17.1	0	0	0	0	0	0	0	0	0	0	0	0	0	0	0	0	0	0	0	12	7	36	85	0	19	14	31	64	NA	NA	NA	NA	NA	NA	NA	NA	NA	NA	NA	NA	NA	NA	NA	NA	NA	NA	NA
594895	Illegio	30.92	0	0	0	0	0	0	0	0	0	0	0	0	0	0	0	0	0	0	0	14	10	23	70	1	14	15	17	46	NA	NA	NA	NA	NA	NA	NA	NA	NA	NA	NA	NA	NA	NA	NA	NA	NA	NA	NA
594896	Illegio	20.5	0	0	0	0	0	0	0	0	0	0	0	0	0	0	0	0	0	0	0	0	0	18	100	0	12	23	20	55	NA	NA	NA	NA	NA	NA	NA	NA	NA	NA	NA	NA	NA	NA	NA	NA	NA	NA	NA
594898	Illegio	36.82	0	0	0	0	0	0	0	0	0	0	0	0	0	0	0	0	0	0	0	4	4	26	98	0	10	7	20	37	NA	NA	NA	NA	NA	NA	NA	NA	NA	NA	NA	NA	NA	NA	NA	NA	NA	NA	NA
594906	Illegio	26.58	0	0	0	0	0	0	0	0	0	0	0	0	0	0	0	0	0	0	0	0	1	18	100	0	19	24	19	62	NA	NA	NA	NA	NA	NA	NA	NA	NA	NA	NA	NA	NA	NA	NA	NA	NA	NA	NA
594912	Illegio	24.39	0	0	0	0	0	0	0	0	0	0	0	0	0	0	0	0	0	0	0	2	2	18	100	0	9	10	33	52	NA	NA	NA	NA	NA	NA	NA	NA	NA	NA	NA	NA	NA	NA	NA	NA	NA	NA	NA
594915	Illegio	24.21	0	0	0	0	0	0	0	0	0	0	0	0	0	0	0	0	0	0	0	0	0	18	100	0	13	18	18	49	NA	NA	NA	NA	NA	NA	NA	NA	NA	NA	NA	NA	NA	NA	NA	NA	NA	NA	NA
594916	Illegio	11.86	0	0	0	0	0	0	0	0	0	0	0	0	0	0	0	0	0	0	0	0	0	18	100	0	20	16	17	53	NA	NA	NA	NA	NA	NA	NA	NA	NA	NA	NA	NA	NA	NA	NA	NA	NA	NA	NA
594919	Illegio	17.54	0	0	0	0	0	0	0	0	0	1	0	0	0	0	0	0	1	0	1	0	0	18	100	0	13	14	12	39	NA	NA	NA	NA	NA	NA	NA	NA	NA	NA	NA	NA	NA	NA	NA	NA	NA	NA	NA
594925	Illegio	17.02	0	0	0	0	0	0	0	0	0	0	0	0	0	0	0	0	0	0	0	1	1	18	100	0	24	14	15	53	NA	NA	NA	NA	NA	NA	NA	NA	NA	NA	NA	NA	NA	NA	NA	NA	NA	NA	NA
594926	Illegio	30.06	0	0	0	0	0	0	0	0	0	0	0	0	0	0	0	0	0	0	0	2	0	18	100	0	12	16	18	46	NA	NA	NA	NA	NA	NA	NA	NA	NA	NA	NA	NA	NA	NA	NA	NA	NA	NA	NA
594933	Illegio	24.61	0	0	0	0	0	0	0	0	0	1	0	0	0	0	0	0	1	0	1	0	0	18	100	0	7	11	24	42	9	5	5	5	24	5	4	0	6	15	7	2	NA	NA	3	6	5	4	8
594935	Illegio	23.43	0	0	0	0	0	0	0	0	0	1	0	0	0	0	0	0	1	0	1	1	1	18	90	1	31	10	14	55	NA	NA	NA	NA	NA	NA	NA	NA	NA	NA	NA	NA	NA	NA	NA	NA	NA	NA	NA
594943	Illegio	37.62	0	0	0	0	0	0	0	0	0	0	0	0	0	0	0	0	0	0	0	0	0	18	100	0	11	11	19	41	NA	NA	NA	NA	NA	NA	NA	NA	NA	NA	NA	NA	NA	NA	NA	NA	NA	NA	NA
594944	Illegio	36.8	0	0	0	0	0	0	0	0	0	1	0	0	0	0	0	0	1	0	2	7	4	25	90	0	19	16	12	47	7	0	3	4	14	5	4	6	3	18	9	1	0	10	7	8	6	5	5
594945	Illegio	24.96	0	0	0	0	0	0	0	0	0	0	0	0	0	0	0	0	0	0	0	7	8	24	90	0	18	5	13	36	NA	NA	NA	NA	NA	NA	NA	NA	NA	NA	NA	NA	NA	NA	NA	NA	NA	NA	NA
594946	Illegio	22.87	0	0	0	0	0	0	0	0	0	0	0	0	0	0	0	0	0	0	0	0	0	18	100	0	8	8	28	44	NA	NA	NA	NA	NA	NA	NA	NA	NA	NA	NA	NA	NA	NA	NA	NA	NA	NA	NA
594947	Illegio	36	0	0	0	0	0	0	0	0	0	0	0	0	0	0	0	0	0	0	0	0	0	18	100	0	14	21	24	59	NA	NA	NA	NA	NA	NA	NA	NA	NA	NA	NA	NA	NA	NA	NA	NA	NA	NA	NA
594948	Illegio	32.94	0	0	0	0	0	0	0	0	0	0	0	0	0	0	0	0	0	0	0	0	0	18	100	0	9	12	20	41	9	6	1	7	23	3	0	1	0	4	1	0	2	3	6	6	5	3	0
594949	Illegio	30.36	0	0	0	0	0	0	0	0	0	0	0	0	0	0	0	0	0	0	0	0	0	18	100	0	10	14	34	58	NA	NA	NA	NA	NA	NA	NA	NA	NA	NA	NA	NA	NA	NA	NA	NA	NA	NA	NA
594951	Illegio	21.64	0	0	0	0	0	0	0	0	0	0	0	0	0	0	0	0	0	0	0	3	2	18	100	0	9	13	26	48	NA	NA	NA	NA	NA	NA	NA	NA	NA	NA	NA	NA	NA	NA	NA	NA	NA	NA	NA
594953	Illegio	17.5	0	0	0	0	0	0	0	0	0	0	0	0	0	0	0	0	0	0	0	0	0	18	100	0	9	8	29	46	NA	NA	NA	NA	NA	NA	NA	NA	NA	NA	NA	NA	NA	NA	NA	NA	NA	NA	NA
594959	Illegio	13.37	0	0	0	0	0	0	0	0	0	0	0	0	0	0	0	0	0	0	0	2	1	18	100	0	7	8	16	31	9	6	3	4	22	2	2	0	3	7	6	8	5	19	2	7	7	4	5
594965	Illegio	29.66	0	0	0	0	0	0	0	0	0	0	0	0	0	0	0	0	0	0	0	0	1	20	98	0	8	9	27	44	NA	NA	NA	NA	NA	NA	NA	NA	NA	NA	NA	NA	NA	NA	NA	NA	NA	NA	NA
594966	Illegio	21.44	0	0	0	0	0	0	0	0	0	1	1	0	0	0	0	0	0	0	1	0	0	18	100	0	16	11	19	46	NA	NA	NA	NA	NA	NA	NA	NA	NA	NA	NA	NA	NA	NA	NA	NA	NA	NA	NA
594969	Illegio	19.3	0	0	0	0	0	0	0	0	0	1	1	0	0	0	0	0	1	0	2	10	7	26	81	0	22	6	12	40	NA	NA	NA	NA	NA	NA	NA	NA	NA	NA	NA	NA	NA	NA	NA	NA	NA	NA	NA
594972	Illegio	17.97	0	0	0	0	0	0	0	0	0	0	0	0	0	0	0	0	0	0	0	0	1	18	100	0	8	10	12	30	7	1	6	0	14	0	3	2	1	6	1	4	2	7	4	8	8	5	1
594974	Illegio	24.56	0	0	0	0	0	0	0	0	0	0	0	0	0	0	0	0	0	0	0	7	5	25	98	0	27	16	23	66	8	4	6	5	23	8	7	5	6	26	8	3	4	15	5	4	3	3	6
594979	Illegio	25.74	0	0	0	0	0	0	0	0	0	0	0	0	0	0	0	0	0	0	0	0	0	18	100	1	11	9	21	41	NA	NA	NA	NA	NA	NA	NA	NA	NA	NA	NA	NA	NA	NA	NA	NA	NA	NA	NA
594980	Illegio	27.32	0	0	0	0	0	0	0	0	0	0	0	0	0	0	0	0	0	0	0	0	0	18	100	0	8	5	16	29	NA	NA	NA	NA	NA	NA	NA	NA	NA	NA	NA	NA	NA	NA	NA	NA	NA	NA	NA
594984	Illegio	16.42	0	0	0	0	0	0	0	0	0	0	0	0	0	0	0	0	0	0	0	0	0	18	100	0	7	13	14	34	NA	NA	NA	NA	NA	NA	NA	NA	NA	NA	NA	NA	NA	NA	NA	NA	NA	NA	NA
594987	Illegio	26.59	0	0	0	0	0	0	0	0	0	0	0	0	0	0	0	0	0	0	0	2	1	18	100	0	8	9	15	32	8	1	6	2	17	1	4	1	3	9	6	8	4	18	3	8	7	5	8
594988	Illegio	21.49	0	0	0	0	0	0	0	0	0	0	0	0	0	0	0	0	0	0	0	1	2	19	98	0	10	14	18	42	NA	NA	NA	NA	NA	NA	NA	NA	NA	NA	NA	NA	NA	NA	NA	NA	NA	NA	NA
594989	Illegio	20.53	0	0	0	0	0	0	0	0	0	1	0	0	0	0	0	0	0	1	1	1	0	18	100	0	9	25	19	53	5	4	6	3	18	1	4	4	1	10	NA	NA	3	NA	2	8	8	3	11
594991	Illegio	18.76	0	0	0	0	0	0	0	0	0	1	1	0	0	0	0	0	0	0	1	1	1	19	90	0	33	19	21	73	NA	NA	NA	NA	NA	NA	NA	NA	NA	NA	NA	NA	NA	NA	NA	NA	NA	NA	NA
594995	Illegio	33.84	0	0	0	0	0	0	0	0	0	0	0	0	0	0	0	0	0	0	0	1	0	18	100	0	9	8	13	30	8	3	4	5	20	2	2	4	0	8	7	4	2	13	6	6	7	5	11
594996	Illegio	21.87	0	0	0	0	0	0	0	0	0	1	0	0	0	0	0	0	0	1	1	2	3	18	100	1	19	10	14	43	NA	NA	NA	NA	NA	NA	NA	NA	NA	NA	NA	NA	NA	NA	NA	NA	NA	NA	NA
594997	Illegio	31.81	0	0	0	0	0	0	0	0	0	0	0	0	0	0	0	0	0	0	0	1	0	18	100	0	7	5	20	32	5	3	4	3	15	2	3	4	3	12	4	6	4	14	6	8	7	4	10
594999	Illegio	16.82	0	0	0	0	0	0	0	0	0	0	0	0	0	0	0	0	0	0	0	0	0	18	100	0	7	6	20	33	7	0	5	1	13	1	3	0	0	4	3	8	4	15	6	8	7	5	10
595002	Illegio	27.79	0	0	0	0	0	0	0	0	0	0	0	0	0	0	0	0	0	0	0	0	0	18	100	0	9	17	32	58	2	2	4	2	10	5	5	7	1	18	4	1	2	7	3	8	4	3	6
595004	Illegio	34.56	0	0	0	0	0	0	0	0	0	0	0	0	0	0	0	0	0	0	0	1	1	18	100	0	24	17	20	61	10	6	7	6	29	4	2	5	0	11	5	2	1	8	5	5	6	4	7
595006	Illegio	20.46	0	0	0	0	0	0	0	0	0	0	0	0	0	0	0	0	0	0	0	2	2	18	98	0	14	7	25	46	2	4	7	2	15	5	6	7	1	19	4	1	3	8	4	3	3	3	8
595007	Illegio	21.02	0	0	0	0	0	0	0	0	0	1	1	0	0	0	1	0	0	0	1	5	5	26	98	0	19	6	10	35	3	0	1	4	8	7	5	5	2	19	5	0	1	6	5	4	7	3	9
595008	Illegio	28.73	0	0	0	0	0	0	0	0	0	0	0	0	0	0	0	0	0	0	0	2	2	18	100	1	17	9	12	38	9	3	4	6	22	3	3	0	0	6	7	5	2	14	8	8	8	4	6
595011	Illegio	29.95	0	0	0	0	0	0	0	0	0	0	0	0	0	0	0	0	0	0	0	0	0	18	100	1	16	23	21	60	6	1	4	5	16	4	6	2	1	13	6	7	4	17	7	3	6	5	5
595015	Illegio	16.16	0	0	0	0	0	0	0	0	0	1	0	0	0	0	0	0	1	0	1	0	0	18	100	0	26	19	19	64	6	3	3	4	16	7	5	4	0	16	6	6	6	18	5	5	7	4	3
595016	Illegio	29.84	0	0	0	0	0	0	0	0	0	0	0	0	0	0	0	0	0	0	0	0	0	18	100	1	24	17	14	55	7	3	3	4	17	3	2	0	0	5	3	6	2	11	5	6	3	5	11
595017	Illegio	28.7	0	0	0	0	0	0	0	0	0	0	0	0	0	0	0	0	0	0	0	0	0	18	100	0	9	5	20	34	NA	NA	NA	NA	NA	NA	NA	NA	NA	NA	NA	NA	NA	NA	NA	NA	NA	NA	NA
595019	Illegio	33.95	0	0	0	0	0	0	0	0	0	0	0	0	0	0	0	0	0	0	0	2	0	18	95	0	7	11	20	38	6	5	3	6	20	3	5	3	2	13	7	2	3	12	2	5	6	2	4
595020	Illegio	25.94	0	0	0	0	0	0	0	0	0	0	0	0	0	0	0	0	0	0	0	2	0	19	82	0	7	7	14	28	4	4	6	3	17	4	3	3	3	13	6	5	3	14	1	4	4	3	6
595022	Illegio	15.37	0	0	0	0	0	0	0	0	0	0	0	0	0	0	0	0	0	0	0	2	0	18	100	0	9	17	16	42	NA	NA	NA	NA	NA	NA	NA	NA	NA	NA	NA	NA	NA	NA	NA	NA	NA	NA	NA
595023	Illegio	28.05	0	0	0	0	0	0	0	0	0	0	0	0	0	0	0	0	0	0	0	2	0	18	100	0	7	5	11	23	8	1	5	2	16	1	2	1	0	4	8	6	6	20	7	8	7	5	10
595024	Illegio	38.46	0	0	0	0	0	0	0	0	0	0	0	0	0	0	0	0	0	0	0	2	0	22	92	0	9	17	25	51	5	2	4	1	12	4	5	2	4	15	5	5	3	13	3	6	2	3	4
595027	Illegio	30.01	0	0	0	0	0	0	0	0	0	0	0	0	0	0	0	0	0	0	0	3	0	21	100	0	13	25	33	71	5	8	8	10	31	2	3	5	3	13	7	4	3	14	5	6	4	3	3
595029	Illegio	30.06	0	0	0	0	0	0	0	0	0	1	0	0	0	0	0	0	1	0	1	3	0	21	81	0	10	20	17	47	NA	NA	NA	NA	NA	NA	NA	NA	NA	NA	NA	NA	NA	NA	NA	NA	NA	NA	NA
595034	Illegio	28.13	0	0	0	0	0	0	0	0	0	0	0	0	0	0	0	0	0	0	0	3	0	18	100	0	7	7	27	41	1	4	3	4	12	5	4	7	4	20	4	1	1	6	3	6	4	3	4
595035	Illegio	13.07	0	0	0	0	0	0	0	0	0	0	0	0	0	0	0	0	0	0	0	2	0	19	100	0	7	5	16	28	9	5	6	3	23	1	2	2	2	7	4	3	2	9	4	6	7	4	9
595042	Illegio	31.07	0	0	0	0	0	0	0	0	0	0	0	0	0	0	0	0	0	0	0	6	6	20	89	0	17	17	18	52	NA	NA	NA	NA	NA	NA	NA	NA	NA	NA	NA	NA	NA	NA	NA	NA	NA	NA	NA
595052	Illegio	15.44	0	0	0	0	0	0	0	0	0	0	0	0	0	0	0	0	0	0	0	9	13	25	82	1	10	5	13	28	6	2	4	4	16	2	6	0	4	12	6	6	4	16	2	6	6	5	11
595054	Illegio	32.61	0	0	0	0	0	0	0	0	0	0	0	0	0	0	0	0	0	0	0	2	0	18	100	0	13	5	22	40	NA	NA	NA	NA	NA	NA	NA	NA	NA	NA	NA	NA	NA	NA	NA	NA	NA	NA	NA
595056	Illegio	20.8	0	0	0	0	0	0	0	0	0	0	0	0	0	0	0	0	0	0	0	4	0	27	100	0	12	5	21	38	NA	NA	NA	NA	NA	NA	NA	NA	NA	NA	NA	NA	NA	NA	NA	NA	NA	NA	NA
595060	Illegio	40.14	0	0	0	0	0	0	0	0	0	0	0	0	0	0	0	0	0	0	0	4	0	21	100	0	7	5	21	33	NA	NA	NA	NA	NA	NA	NA	NA	NA	NA	NA	NA	NA	NA	NA	NA	NA	NA	NA
598846	Resia	30.9	0	0	0	0	0	0	0	0	0	0	0	0	0	0	0	0	0	0	0	7	3	23	100	0	7	17	27	51	NA	NA	NA	NA	NA	NA	NA	NA	NA	NA	NA	NA	NA	NA	NA	NA	NA	NA	NA
598848	Resia	16.49	0	0	0	0	0	0	0	0	0	0	0	0	0	0	0	0	0	0	0	0	0	18	100	0	7	5	12	24	NA	NA	NA	NA	NA	NA	NA	NA	NA	NA	NA	NA	NA	NA	NA	NA	NA	NA	NA
598850	Resia	16.28	0	0	0	0	0	0	0	0	0	1	0	0	0	0	0	0	1	0	1	6	1	18	100	0	7	13	10	30	NA	NA	NA	NA	NA	NA	NA	NA	NA	NA	NA	NA	NA	NA	NA	NA	NA	NA	NA
598863	Resia	41.96	0	0	0	0	0	0	0	0	0	0	0	0	0	0	0	0	0	0	0	12	3	29	70	0	28	11	11	50	NA	NA	NA	NA	NA	NA	NA	NA	NA	NA	NA	NA	NA	NA	NA	NA	NA	NA	NA
598866	Resia	9.81	0	0	0	0	0	0	0	0	0	0	0	0	0	0	0	0	0	0	0	25	16	35	100	0	7	9	12	28	NA	NA	NA	NA	NA	NA	NA	NA	NA	NA	NA	NA	NA	NA	NA	NA	NA	NA	NA
598869	Resia	56.46	0	0	0	0	0	0	0	0	0	0	0	0	0	0	0	0	0	0	0	4	4	24	100	1	7	8	20	35	NA	NA	NA	NA	NA	NA	NA	NA	NA	NA	NA	NA	NA	NA	NA	NA	NA	NA	NA
598872	Resia	51.9	0	0	0	0	0	0	0	0	0	0	0	0	0	0	0	0	0	0	0	6	4	19	100	0	7	5	24	36	NA	NA	NA	NA	NA	NA	NA	NA	NA	NA	NA	NA	NA	NA	NA	NA	NA	NA	NA
598873	Resia	41.73	0	0	0	0	0	0	0	0	0	0	0	0	0	0	0	0	0	0	0	1	0	18	33	0	10	5	18	33	NA	NA	NA	NA	NA	NA	NA	NA	NA	NA	NA	NA	NA	NA	NA	NA	NA	NA	NA
598876	Resia	65.94	0	0	0	0	0	0	0	0	0	0	0	0	0	0	0	0	0	0	0	6	1	20	92	0	7	14	20	41	NA	NA	NA	NA	NA	NA	NA	NA	NA	NA	NA	NA	NA	NA	NA	NA	NA	NA	NA
598879	Resia	47.18	0	0	0	0	0	0	0	0	0	0	0	0	0	0	0	0	0	0	0	12	10	26	100	0	14	21	18	53	NA	NA	NA	NA	NA	NA	NA	NA	NA	NA	NA	NA	NA	NA	NA	NA	NA	NA	NA
598882	Resia	43.36	0	0	0	0	0	0	0	0	0	0	0	0	0	0	0	0	0	0	0	2	2	19	90	0	7	10	20	37	NA	NA	NA	NA	NA	NA	NA	NA	NA	NA	NA	NA	NA	NA	NA	NA	NA	NA	NA
598966	Resia	16.74	0	0	0	0	0	0	0	0	0	0	0	0	0	0	0	0	0	0	0	20	10	27	95	0	8	10	11	29	NA	NA	NA	NA	NA	NA	NA	NA	NA	NA	NA	NA	NA	NA	NA	NA	NA	NA	NA
598967	Resia	28.71	0	0	0	0	0	0	0	0	0	0	0	0	0	0	0	0	0	0	0	0	1	23	100	0	11	11	17	39	NA	NA	NA	NA	NA	NA	NA	NA	NA	NA	NA	NA	NA	NA	NA	NA	NA	NA	NA
598968	Resia	39.52	0	0	0	0	0	0	0	0	0	0	0	0	0	0	0	0	0	0	0	11	5	31	80	1	18	14	8	40	NA	NA	NA	NA	NA	NA	NA	NA	NA	NA	NA	NA	NA	NA	NA	NA	NA	NA	NA
598970	Resia	27.47	0	0	0	0	0	0	0	0	0	0	0	0	0	0	0	0	0	0	0	2	0	22	100	0	7	21	28	56	NA	NA	NA	NA	NA	NA	NA	NA	NA	NA	NA	NA	NA	NA	NA	NA	NA	NA	NA
598972	Resia	31.37	0	0	0	0	0	0	0	0	0	0	0	0	0	0	0	0	0	0	0	3	0	18	100	0	7	10	14	31	NA	NA	NA	NA	NA	NA	NA	NA	NA	NA	NA	NA	NA	NA	NA	NA	NA	NA	NA
598974	Resia	50.87	0	0	0	0	0	0	0	0	0	0	0	0	0	0	0	0	0	0	0	0	0	18	100	0	7	11	26	44	4	2	4	5	15	2	3	2	3	10	5	3	2	10	3	7	4	4	9
598977	Resia	38	0	0	0	0	0	0	0	0	0	0	0	0	0	0	0	0	0	0	0	0	1	21	100	0	8	5	16	29	NA	NA	NA	NA	NA	NA	NA	NA	NA	NA	NA	NA	NA	NA	NA	NA	NA	NA	NA
599029	Resia	14.49	0	0	0	0	0	0	0	0	0	0	0	0	0	0	0	0	0	0	0	21	11	40	61	0	9	10	11	30	NA	NA	NA	NA	NA	NA	NA	NA	NA	NA	NA	NA	NA	NA	NA	NA	NA	NA	NA
599030	Resia	54.76	0	0	0	0	0	0	0	0	0	0	0	0	0	0	0	0	0	0	0	0	0	19	100	0	7	9	11	27	NA	NA	NA	NA	NA	NA	NA	NA	NA	NA	NA	NA	NA	NA	NA	NA	NA	NA	NA
599034	Resia	13.49	0	0	0	0	0	0	0	0	0	0	0	0	0	0	0	0	0	0	0	3	2	22	100	0	9	7	12	28	NA	NA	NA	NA	NA	NA	NA	NA	NA	NA	NA	NA	NA	NA	NA	NA	NA	NA	NA
599042	Resia	6.4	0	0	0	0	0	0	0	0	0	0	0	0	0	0	0	0	0	0	0	24	13	36	100	0	23	9	8	40	NA	NA	NA	NA	NA	NA	NA	NA	NA	NA	NA	NA	NA	NA	NA	NA	NA	NA	NA
599043	Resia	31.16	0	0	0	0	0	0	0	0	0	0	0	0	0	0	0	0	0	0	0	18	13	40	100	0	19	9	12	40	NA	NA	NA	NA	NA	NA	NA	NA	NA	NA	NA	NA	NA	NA	NA	NA	NA	NA	NA
599049	Resia	20.85	0	0	0	0	0	0	0	0	0	0	0	0	0	0	0	0	0	0	0	10	1	24	100	0	15	12	37	64	NA	NA	NA	NA	NA	NA	NA	NA	NA	NA	NA	NA	NA	NA	NA	NA	NA	NA	NA
599051	Resia	11.93	0	0	0	0	0	0	0	0	0	0	0	0	0	0	0	0	0	0	0	5	2	26	90	0	10	15	18	43	NA	NA	NA	NA	NA	NA	NA	NA	NA	NA	NA	NA	NA	NA	NA	NA	NA	NA	NA
599053	Resia	50.9	0	0	0	0	0	0	0	0	0	0	0	0	0	0	0	0	0	0	0	6	4	27	100	0	11	17	22	50	NA	NA	NA	NA	NA	NA	NA	NA	NA	NA	NA	NA	NA	NA	NA	NA	NA	NA	NA
599059	Resia	22.43	0	0	0	0	0	0	0	0	0	1	0	0	0	0	1	0	0	1	NA	0	0	18	100	1	17	5	24	46	NA	NA	NA	NA	NA	NA	NA	NA	NA	NA	NA	NA	NA	NA	NA	NA	NA	NA	NA
599075	Resia	16.34	0	0	0	0	0	0	0	0	0	0	0	0	0	0	0	0	0	0	0	1	0	20	100	0	7	8	12	27	NA	NA	NA	NA	NA	NA	NA	NA	NA	NA	NA	NA	NA	NA	NA	NA	NA	NA	NA
599084	Resia	37.73	0	0	0	0	0	0	0	0	0	0	0	0	0	0	0	0	0	0	0	3	1	19	92	0	14	10	13	37	NA	NA	NA	NA	NA	NA	NA	NA	NA	NA	NA	NA	NA	NA	NA	NA	NA	NA	NA
599088	Resia	8.04	0	0	0	0	0	0	0	0	0	0	0	0	0	0	0	0	0	0	0	2	0	21	100	0	10	10	20	40	NA	NA	NA	NA	NA	NA	NA	NA	NA	NA	NA	NA	NA	NA	NA	NA	NA	NA	NA
599090	Resia	49.02	0	0	0	0	0	0	0	0	0	0	0	0	0	0	0	0	0	0	0	9	9	26	95	0	17	20	24	61	NA	NA	NA	NA	NA	NA	NA	NA	NA	NA	NA	NA	NA	NA	NA	NA	NA	NA	NA
599092	Resia	66.58	0	0	0	0	0	0	0	0	0	1	0	0	0	0	0	0	1	1	1	4	7	29	45	0	15	15	18	48	4	5	4	6	19	4	3	1	3	11	3	0	4	7	1	7	5	5	4
599096	Resia	18.84	0	0	0	0	0	0	0	0	0	0	0	0	0	0	0	0	0	0	0	7	5	23	100	0	17	9	20	46	NA	NA	NA	NA	NA	NA	NA	NA	NA	NA	NA	NA	NA	NA	NA	NA	NA	NA	NA
599115	Resia	20.91	0	0	0	0	0	0	0	0	0	1	0	0	0	0	0	0	1	0	1	9	3	30	100	1	10	10	8	28	NA	NA	NA	NA	NA	NA	NA	NA	NA	NA	NA	NA	NA	NA	NA	NA	NA	NA	NA
599118	Resia	18.22	0	0	0	0	0	0	0	0	0	1	0	0	0	0	0	0	1	0	1	2	1	19	98	0	10	18	22	50	NA	NA	NA	NA	NA	NA	NA	NA	NA	NA	NA	NA	NA	NA	NA	NA	NA	NA	NA
599120	Resia	15.58	0	0	0	0	0	0	0	0	0	0	0	0	0	0	0	0	0	0	0	17	7	37	91	0	7	20	32	59	NA	NA	NA	NA	NA	NA	NA	NA	NA	NA	NA	NA	NA	NA	NA	NA	NA	NA	NA
599121	Resia	3.33	0	0	0	0	0	0	0	0	0	0	0	0	0	0	0	0	0	0	0	22	10	34	81	0	9	18	22	49	NA	NA	NA	NA	NA	NA	NA	NA	NA	NA	NA	NA	NA	NA	NA	NA	NA	NA	NA
599123	Resia	11.95	0	0	0	0	0	0	0	0	0	0	0	0	0	0	0	0	0	0	0	26	14	38	61	1	12	12	21	45	NA	NA	NA	NA	NA	NA	NA	NA	NA	NA	NA	NA	NA	NA	NA	NA	NA	NA	NA
599124	Resia	25.26	0	0	0	0	0	0	0	0	0	0	0	0	0	0	0	0	0	0	0	18	6	30	95	0	7	15	20	42	NA	NA	NA	NA	NA	NA	NA	NA	NA	NA	NA	NA	NA	NA	NA	NA	NA	NA	NA
599125	Resia	51.19	0	0	0	0	0	0	0	0	0	0	0	0	0	0	0	0	0	0	0	0	0	18	100	0	7	9	14	30	NA	NA	NA	NA	NA	NA	NA	NA	NA	NA	NA	NA	NA	NA	NA	NA	NA	NA	NA
599126	Resia	21.13	0	0	0	0	0	0	0	0	0	0	0	0	0	0	0	0	0	0	0	3	1	20	100	0	10	20	25	55	NA	NA	NA	NA	NA	NA	NA	NA	NA	NA	NA	NA	NA	NA	NA	NA	NA	NA	NA
599127	Resia	45.35	0	0	0	0	0	0	0	0	0	0	0	0	0	0	0	0	0	0	0	28	16	41	95	0	17	10	12	39	NA	NA	NA	NA	NA	NA	NA	NA	NA	NA	NA	NA	NA	NA	NA	NA	NA	NA	NA
599128	Resia	31.41	0	0	0	0	0	0	0	0	0	0	0	0	0	0	0	0	0	0	0	6	6	26	91	0	7	16	30	53	NA	NA	NA	NA	NA	NA	NA	NA	NA	NA	NA	NA	NA	NA	NA	NA	NA	NA	NA
599130	Resia	18.19	0	0	0	0	0	0	0	0	0	0	0	0	0	0	0	0	0	0	0	9	10	32	100	0	12	14	14	40	7	1	4	4	16	7	7	2	1	17	5	6	3	14	4	6	4	5	7
599132	Resia	59.21	0	0	0	0	0	0	0	0	0	0	0	0	0	0	0	0	0	0	0	0	0	18	100	0	15	6	16	37	NA	NA	NA	NA	NA	NA	NA	NA	NA	NA	NA	NA	NA	NA	NA	NA	NA	NA	NA
599133	Resia	19.13	0	0	0	0	0	0	0	0	0	0	0	0	0	0	0	0	0	0	0	0	0	18	100	0	7	5	15	27	5	3	3	2	13	2	4	0	1	7	5	4	1	10	5	5	4	2	7
599134	Resia	17.45	0	0	0	0	0	0	0	0	0	1	0	0	0	0	0	0	1	0	1	15	2	25	100	0	20	16	20	56	10	7	6	3	26	8	4	3	2	17	8	7	4	19	5	5	3	3	6
599153	Sauris	10.34	0	0	0	0	0	0	0	0	NA	0	0	0	0	0	0	0	0	NA	0	1	0	18	100	0	14	16	19	49	7	4	3	5	19	1	5	7	4	17	4	1	4	9	4	7	4	4	9
599154	Sauris	15.42	0	0	0	0	0	0	0	0	NA	0	0	0	0	0	0	0	0	NA	0	2	1	22	92	0	15	8	17	40	7	2	5	3	17	4	3	3	1	11	5	6	4	15	5	7	7	5	10
599156	Sauris	27.02	0	0	0	0	0	0	0	0	NA	0	0	0	0	0	0	0	0	NA	0	2	0	21	100	0	7	5	14	26	3	5	4	3	15	2	6	4	2	14	8	6	5	19	6	7	5	1	8
599157	Sauris	25.69	0	0	0	0	0	0	0	0	NA	0	0	0	0	0	0	0	0	NA	0	5	6	23	85	0	13	5	10	28	8	2	5	5	20	8	3	3	2	16	6	7	4	17	6	5	5	4	6
599162	Sauris	36.67	0	0	0	0	0	0	0	0	NA	0	0	0	0	0	0	0	0	NA	1	2	0	19	100	0	7	17	22	46	4	3	2	5	14	2	5	0	0	7	7	3	1	11	7	7	7	5	8
599163	Sauris	40.72	0	0	0	0	0	0	0	0	NA	0	0	0	0	0	0	0	0	NA	0	3	4	22	100	0	7	7	16	30	7	2	6	6	21	5	3	2	3	13	5	7	5	17	2	8	7	5	8
599164	Sauris	13.71	0	0	0	0	0	0	0	0	NA	0	0	0	0	0	0	0	0	NA	0	4	3	25	80	0	15	23	22	60	3	2	4	3	12	2	4	5	1	12	7	4	1	12	4	6	6	3	5
599169	Sauris	12.9	0	0	0	0	0	0	0	0	NA	1	0	0	0	0	0	0	1	NA	1	2	1	18	100	0	11	5	16	32	2	4	2	2	10	5	3	3	2	13	9	5	2	16	4	6	4	5	5
599227	Resia	9.95	0	0	0	0	0	0	0	0	0	0	0	0	0	0	0	0	0	0	0	11	6	24	100	0	15	19	27	61	NA	NA	NA	NA	NA	NA	NA	NA	NA	NA	NA	NA	NA	NA	NA	NA	NA	NA	NA
599231	Resia	13.67	0	0	0	0	0	0	0	0	0	0	0	0	0	0	0	0	0	0	0	11	7	23	100	0	8	9	12	29	4	2	2	1	9	6	6	2	1	15	9	4	3	16	4	6	7	5	7
599232	Resia	22.78	0	0	0	0	0	0	0	0	0	1	0	0	0	0	1	0	0	0	2	29	15	36	100	1	11	11	18	40	10	5	4	6	25	6	4	2	1	13	7	5	4	16	6	6	6	4	6
599237	Resia	6.89	0	0	0	0	0	0	0	0	0	1	0	0	0	0	1	0	0	0	1	19	11	35	100	0	7	9	15	31	7	8	6	7	28	5	7	2	4	18	8	4	2	14	5	4	5	4	6
599238	Resia	25.16	0	0	0	0	0	0	0	0	0	0	0	0	0	0	0	0	0	0	0	2	0	24	100	0	7	5	16	28	6	1	4	4	15	4	4	0	4	12	5	6	5	16	5	6	7	5	8
599239	Resia	15.45	0	0	0	0	0	0	0	0	0	0	0	0	0	0	0	0	0	0	0	8	5	25	100	1	11	8	25	44	NA	NA	NA	NA	NA	NA	NA	NA	NA	NA	NA	NA	NA	NA	NA	NA	NA	NA	NA
599240	Resia	32	0	0	0	0	0	0	0	0	0	0	0	0	0	0	0	0	0	0	0	11	9	26	95	0	11	9	23	43	5	4	3	4	16	4	3	3	3	13	4	7	3	14	6	7	6	5	8
599245	Resia	34.34	0	0	0	0	0	0	0	0	0	0	0	0	0	0	0	0	0	0	0	6	8	30	61	0	19	21	24	64	6	4	4	2	16	7	4	6	2	19	8	3	4	15	8	3	5	5	2
599253	Resia	18.84	0	0	0	0	0	0	0	0	0	0	0	0	0	0	0	0	0	0	0	17	7	25	100	0	29	17	18	64	2	3	1	2	8	3	3	3	4	13	5	1	0	6	1	1	2	1	3
599254	Resia	9.6	0	0	0	0	0	0	0	0	0	1	0	0	0	0	0	0	1	0	1	26	16	34	100	1	7	13	12	32	1	3	1	1	6	2	3	2	1	8	9	1	0	10	3	0	0	1	3
599258	Resia	6.83	0	0	0	0	0	0	0	0	0	0	0	0	0	0	0	0	0	0	0	23	12	39	91	0	30	17	23	70	4	5	4	3	16	6	5	6	6	23	7	5	5	17	3	5	2	2	7
599260	Resia	19.52	0	0	0	0	0	0	0	0	0	0	0	0	0	0	0	0	0	0	0	9	7	31	91	0	15	17	24	56	NA	NA	NA	NA	NA	NA	NA	NA	NA	NA	NA	NA	NA	NA	NA	NA	NA	NA	NA
599284	Resia	37.46	0	0	0	0	0	0	0	0	0	1	0	0	0	0	0	0	1	0	1	10	3	23	100	0	15	21	24	60	NA	NA	NA	NA	NA	NA	NA	NA	NA	NA	NA	NA	NA	NA	NA	NA	NA	NA	NA
599289	Resia	20.25	0	0	0	0	0	0	0	0	0	0	0	0	0	0	0	0	0	0	0	12	4	21	100	0	13	14	20	47	4	3	6	4	17	1	3	1	2	7	5	2	3	10	7	7	8	4	6
599290	Resia	17.47	0	0	0	0	0	0	0	0	0	0	0	0	0	0	0	0	0	0	0	10	1	29	100	0	11	15	20	46	NA	NA	NA	NA	NA	NA	NA	NA	NA	NA	NA	NA	NA	NA	NA	NA	NA	NA	NA
599316	Resia	25.43	0	0	0	0	0	0	0	0	0	0	0	0	0	0	0	0	0	0	0	9	7	20	92	0	7	5	16	28	3	1	1	3	8	5	2	5	3	15	3	3	2	8	8	2	6	5	7
599317	Resia	33.89	0	0	0	0	0	0	0	0	0	0	0	0	0	0	0	0	0	0	0	12	9	26	100	0	11	5	18	34	9	7	5	6	27	1	4	2	1	8	7	5	4	16	1	8	4	3	4
599321	Resia	4.61	0	0	0	0	0	0	0	0	0	1	0	0	0	0	0	0	1	0	1	13	9	28	95	0	9	21	20	50	NA	NA	NA	NA	NA	NA	NA	NA	NA	NA	NA	NA	NA	NA	NA	NA	NA	NA	NA
599323	Resia	27.6	0	0	0	0	0	0	0	0	0	0	0	0	0	0	0	0	0	0	0	2	2	20	100	0	12	5	16	33	NA	NA	NA	NA	NA	NA	NA	NA	NA	NA	NA	NA	NA	NA	NA	NA	NA	NA	NA
599324	Resia	19.58	0	0	0	0	0	0	0	0	0	0	0	0	0	0	0	0	0	0	0	4	6	21	100	0	10	19	14	43	7	1	7	4	19	8	6	4	3	21	4	4	3	11	5	8	6	4	6
599328	Resia	25.84	0	0	0	0	0	0	0	0	0	0	0	0	0	0	0	0	0	0	0	18	11	22	81	0	19	17	16	52	2	5	5	3	15	8	6	5	5	24	8	3	2	13	3	4	4	1	7
599332	Resia	30.21	0	0	0	0	0	0	0	0	0	1	0	0	0	0	0	0	1	0	1	8	1	21	85	0	13	15	24	52	3	1	4	4	12	3	5	6	4	18	5	3	6	14	2	7	6	2	8
599334	Resia	33.5	0	0	0	0	0	0	0	0	0	1	0	0	0	0	0	0	1	0	1	0	0	18	100	1	7	13	16	36	4	4	6	2	16	2	2	5	5	14	6	3	3	12	5	7	6	4	9
599348	Resia	14.18	0	0	0	0	0	0	0	0	0	1	0	0	0	0	0	0	1	0	1	28	22	45	41	0	27	25	32	84	NA	NA	NA	NA	NA	NA	NA	NA	NA	NA	NA	NA	NA	NA	NA	NA	NA	NA	NA
599349	Resia	43.39	0	0	0	0	0	0	0	0	0	1	0	0	0	0	1	0	0	0	NA	2	0	20	100	0	7	5	20	32	NA	NA	NA	NA	NA	NA	NA	NA	NA	NA	NA	NA	NA	NA	NA	NA	NA	NA	NA
599351	Resia	32.57	0	0	0	0	0	0	0	0	0	1	0	0	0	0	0	0	0	1	0	9	10	22	71	0	15	19	24	58	NA	NA	NA	NA	NA	NA	NA	NA	NA	NA	NA	NA	NA	NA	NA	NA	NA	NA	NA
599352	Resia	50.19	0	0	0	0	0	0	0	0	0	0	0	0	0	0	0	0	0	0	0	3	0	18	100	0	7	17	28	52	NA	NA	NA	NA	NA	NA	NA	NA	NA	NA	NA	NA	NA	NA	NA	NA	NA	NA	NA
599355	Resia	28.22	0	0	0	0	0	0	0	0	0	1	0	0	0	0	0	0	1	0	1	8	13	25	85	0	7	14	15	36	9	2	4	2	17	2	6	5	3	16	9	5	2	16	7	5	7	4	9
599356	Resia	22.28	0	0	0	0	0	0	0	0	0	1	0	0	0	0	0	0	1	0	1	30	16	39	81	NA	11	21	16	48	6	1	6	2	15	8	7	7	5	27	7	7	6	20	3	7	6	4	10
599362	Resia	53.59	0	0	0	0	0	0	0	0	0	0	0	0	0	0	0	0	0	0	0	14	5	27	95	0	7	15	16	38	7	9	6	7	29	6	5	6	5	22	7	2	4	13	3	6	2	2	7
599369	Resia	14.95	0	0	0	0	0	0	0	0	0	0	0	0	0	0	0	0	0	0	0	0	0	18	100	0	7	5	15	27	NA	NA	NA	NA	NA	NA	NA	NA	NA	NA	NA	NA	NA	NA	NA	NA	NA	NA	NA
599385	Resia	34.3	0	0	0	0	0	0	0	0	0	0	0	0	0	0	0	0	0	0	0	2	7	20	100	0	11	6	19	36	6	2	5	2	15	1	1	2	1	5	8	6	2	16	6	8	6	3	8
599388	Resia	23.24	0	0	0	0	0	0	0	0	0	0	0	0	0	0	0	0	0	0	0	5	5	21	100	0	18	17	31	66	8	4	5	5	22	9	5	6	4	24	10	2	6	18	3	4	4	2	5
599391	Resia	31.91	0	0	0	0	0	0	0	0	0	0	0	0	0	0	0	0	0	0	0	0	0	18	100	0	10	8	25	43	7	5	2	3	17	4	4	2	3	13	6	4	5	15	4	4	7	4	3
599394	Resia	28.21	0	0	0	0	0	0	0	0	0	0	0	0	0	0	0	0	0	0	0	3	2	18	100	0	15	25	28	68	2	5	2	3	12	9	6	4	6	25	8	0	1	9	7	2	2	1	5
599398	Resia	30.75	0	0	0	0	0	0	0	0	0	0	0	0	0	0	0	0	0	0	0	2	5	21	100	0	7	6	24	37	5	7	5	3	20	3	2	4	1	10	5	2	3	10	5	8	7	4	6
599408	Resia	26.52	0	0	0	0	0	0	0	0	0	0	0	0	0	0	0	0	0	0	0	2	2	18	100	1	7	20	20	47	6	3	4	4	17	5	6	2	6	19	5	4	2	11	4	3	8	2	9
599415	Resia	35.94	0	0	0	0	0	0	0	0	0	0	0	0	0	0	0	0	0	0	0	6	9	22	100	0	7	9	24	40	NA	NA	NA	NA	NA	NA	NA	NA	NA	NA	NA	NA	NA	NA	NA	NA	NA	NA	NA
599417	Resia	17.04	0	0	0	0	0	0	0	0	0	0	0	0	0	0	0	0	0	0	0	5	0	22	100	0	10	13	20	43	8	7	3	3	21	5	6	4	5	20	8	4	2	14	3	5	5	5	1
599419	Resia	22.12	0	0	0	0	0	0	0	0	0	0	0	0	0	0	0	0	0	0	0	12	3	21	100	0	7	10	20	37	3	3	6	2	14	2	3	0	1	6	6	7	3	16	6	7	7	4	9
599420	Resia	37.87	0	0	0	0	0	0	0	0	0	0	0	0	0	0	0	0	0	0	0	10	11	27	80	0	10	20	16	46	5	4	3	3	15	9	4	7	6	26	5	1	2	8	2	6	4	1	3
599425	Resia	18.42	0	0	0	0	0	0	0	0	0	0	0	0	0	0	0	0	0	0	0	2	2	21	91	0	13	9	19	41	NA	NA	NA	NA	NA	NA	NA	NA	NA	NA	NA	NA	NA	NA	NA	NA	NA	NA	NA
599427	Resia	10.34	0	0	0	0	0	0	0	0	0	0	0	0	0	0	0	0	0	0	0	28	18	36	81	0	17	19	16	52	5	5	4	4	18	10	6	3	6	25	8	2	3	13	5	3	4	3	7
599428	Resia	20.26	0	0	0	0	0	0	0	0	0	0	0	0	0	0	0	0	0	0	0	6	3	23	100	0	7	18	20	45	3	0	4	1	8	4	6	6	4	20	7	3	4	14	4	6	7	4	9
599440	Resia	12.67	0	0	0	0	0	0	0	0	0	0	0	0	0	0	0	0	0	0	0	2	0	18	91	0	7	13	16	36	9	2	3	1	15	3	3	2	2	10	8	4	3	15	6	7	6	4	7
599442	Resia	22.19	0	0	0	0	0	0	0	0	0	0	0	0	0	0	0	0	0	0	0	10	8	32	81	0	27	24	20	71	3	2	1	0	6	9	7	8	5	29	9	3	5	17	5	3	3	1	9
599443	Resia	27.28	0	0	0	0	0	0	0	0	0	0	0	0	0	0	0	0	0	0	0	11	7	27	100	0	7	11	20	38	8	2	5	2	17	8	5	4	5	22	4	3	3	10	4	7	6	5	8
599451	Resia	8.57	0	0	0	0	0	0	0	0	0	0	0	0	0	0	0	0	0	0	0	0	0	21	100	1	10	16	14	40	10	2	5	3	20	3	3	2	0	8	6	5	5	16	7	7	8	5	6
599462	Resia	66.85	0	0	0	0	0	0	0	0	0	0	0	0	0	0	0	0	0	0	0	5	0	21	100	0	9	5	17	31	9	2	7	6	24	1	4	3	3	11	3	4	3	10	2	8	6	5	11
599463	Resia	18.04	0	0	0	0	0	0	0	0	0	0	0	0	0	0	0	0	0	0	0	4	3	21	100	0	13	13	15	41	8	7	6	5	26	3	3	2	2	10	7	3	6	16	3	7	5	4	8
599466	Resia	46.76	0	0	0	0	0	0	0	0	0	1	0	0	0	0	1	0	0	0	1	22	13	31	90	0	10	8	19	37	NA	NA	NA	NA	NA	NA	NA	NA	NA	NA	NA	NA	NA	NA	NA	NA	NA	NA	NA
599467	Resia	12.9	0	0	0	0	0	0	0	0	0	0	0	0	0	0	0	0	0	0	0	3	2	21	100	0	7	7	8	22	8	3	4	3	18	5	2	3	2	12	5	5	1	11	4	6	7	5	5
599477	Resia	57.7	0	0	0	0	0	0	0	0	0	0	0	0	0	0	0	0	0	0	0	22	16	27	100	0	21	17	13	51	3	3	1	1	8	2	3	0	4	9	8	3	0	11	4	1	2	1	3
599483	Resia	15.4	0	0	0	0	0	0	0	0	0	0	0	0	0	0	0	0	0	0	0	0	2	19	100	0	10	12	24	46	3	3	3	2	11	2	4	1	3	10	5	5	3	13	5	5	5	4	7
599487	Resia	16.02	0	0	0	0	0	0	0	0	0	0	0	0	0	0	0	0	0	0	0	1	1	21	100	0	7	13	28	48	5	4	9	7	25	4	5	3	5	17	0	3	2	5	2	5	5	2	4
599492	Resia	30.68	0	0	0	0	0	0	0	0	0	0	0	0	0	0	0	0	0	0	0	16	4	18	100	0	7	5	13	25	9	1	5	0	15	4	5	7	3	19	5	7	4	16	4	7	7	3	5
599495	Resia	6.16	0	0	0	0	0	0	0	0	0	0	0	0	0	0	0	0	0	0	0	7	6	24	100	1	7	5	12	24	8	2	5	4	19	2	4	3	2	11	7	7	4	18	3	7	4	5	8
599498	Resia	19.2	0	0	0	0	0	0	0	0	0	0	0	0	0	0	0	0	0	0	0	0	0	21	90	0	11	12	24	47	7	6	3	8	24	6	3	7	2	18	5	3	1	9	7	4	5	4	2
599499	Resia	30.31	0	0	0	0	0	0	0	0	0	0	0	0	0	0	0	0	0	0	0	19	11	33	100	0	10	5	8	23	7	0	2	1	10	5	5	0	6	16	10	5	4	19	7	8	8	5	7
599501	Resia	55.39	0	0	0	0	0	0	0	0	0	0	0	0	0	0	0	0	0	0	0	0	1	19	100	0	7	9	24	40	9	7	7	8	31	1	1	1	3	6	7	5	3	15	1	6	5	5	7
599509	Resia	51.88	0	0	0	0	0	0	0	0	0	0	0	0	0	0	0	0	0	0	0	2	2	18	90	0	14	7	23	44	5	3	4	3	15	8	4	1	5	18	7	4	1	12	5	4	5	4	6
582009	SanMartino	46.19	1	0	0	0	0	0	0	0	1	0	0	0	0	0	0	0	0	0	0	9	11	28	60	0	14	12	17	43	3	6	5	5	19	3	5	3	4	15	6	7	4	17	3	8	8	5	11
582014	SanMartino	61	1	0	0	0	0	0	0	0	1	1	0	0	0	0	0	0	1	0	1	22	8	24	85	1	12	23	25	60	2	7	3	2	14	4	5	6	0	15	9	3	6	18	6	4	8	4	8
582022	SanMartino	34.75	1	0	0	0	0	0	0	1	0	0	0	0	0	0	0	0	0	0	0	3	4	18	91	0	7	8	16	31	NA	NA	NA	NA	NA	NA	NA	NA	NA	NA	NA	NA	NA	NA	NA	NA	NA	NA	NA
582023	SanMartino	28.9	1	0	0	0	0	0	0	0	1	0	0	0	0	0	0	0	0	0	0	2	0	20	95	0	9	9	15	33	9	1	3	1	14	3	1	3	7	14	6	4	1	11	8	5	6	5	8
582028	SanMartino	63.78	1	0	0	0	0	0	0	1	0	0	0	0	0	0	0	0	0	0	0	10	11	26	60	0	18	19	24	61	NA	NA	NA	NA	NA	NA	NA	NA	NA	NA	NA	NA	NA	NA	NA	NA	NA	NA	NA
582041	SanMartino	26.71	1	0	0	0	0	0	0	1	0	1	0	0	0	0	0	0	1	0	2	13	12	25	90	0	27	15	24	66	6	4	6	3	19	10	7	5	5	27	9	4	6	19	4	2	6	4	10
582042	SanMartino	21.7	1	0	0	0	0	0	0	1	0	1	0	0	0	0	0	0	1	0	NA	14	19	29	81	0	32	16	26	74	5	5	3	1	14	6	5	6	8	25	4	7	2	13	1	6	4	1	6
582059	SanMartino	19.28	1	0	0	0	0	0	1	0	0	0	0	0	0	0	0	0	0	0	0	3	10	36	61	0	19	18	29	66	3	10	7	4	24	10	7	2	7	26	8	2	2	12	3	5	1	3	8
582076	SanMartino	28.29	1	0	0	0	0	0	0	1	0	0	0	0	0	0	0	0	1	0	1	17	16	31	72	0	20	19	22	61	6	5	1	2	14	4	3	6	2	15	8	3	6	17	5	4	3	5	9
582081	SanMartino	42.37	1	0	0	0	0	0	0	0	1	1	0	0	0	0	0	0	1	0	5	10	10	25	92	0	14	13	19	46	9	1	5	3	18	3	1	0	3	7	8	5	3	16	6	8	7	4	3
582116	ERTO	31.53	1	0	0	0	0	0	0	1	0	0	0	0	0	0	0	0	0	0	0	20	24	37	100	1	7	10	19	36	5	3	4	4	16	4	3	5	8	20	8	5	1	14	3	6	5	4	6
582165	ERTO	19.42	1	0	0	0	0	0	0	1	0	1	0	0	0	0	0	0	1	0	2	5	7	20	91	0	8	10	23	41	NA	NA	NA	NA	NA	NA	NA	NA	NA	NA	NA	NA	NA	NA	NA	NA	NA	NA	NA
582210	SanMartino	28.47	1	0	0	0	0	0	0	0	0	0	0	0	0	0	0	0	0	0	0	6	4	22	88	0	11	9	21	41	9	3	6	6	24	7	5	3	6	21	7	7	4	18	5	6	5	5	7
582212	SanMartino	33.51	1	0	0	0	0	0	0	0	1	0	0	0	0	0	0	0	0	0	0	3	7	22	90	0	15	13	24	52	5	6	2	4	17	4	5	6	6	21	7	2	4	13	3	1	2	3	2
582225	SanMartino	31.08	1	0	0	0	0	0	0	1	0	1	0	0	0	0	0	0	1	0	1	10	6	28	55	0	30	13	17	60	NA	NA	NA	NA	NA	NA	NA	NA	NA	NA	NA	NA	NA	NA	NA	NA	NA	NA	NA
582243	SanMartino	30.28	1	0	0	0	0	0	0	1	0	0	0	0	0	0	0	0	0	0	0	15	20	38	75	0	21	23	26	70	4	7	6	5	22	10	4	8	3	25	7	1	3	11	3	0	0	1	1
590465	Clauzetto	24.94	1	0	0	0	0	0	0	0	1	0	0	0	0	0	0	0	0	0	0	10	5	29	92	0	10	15	23	48	5	2	3	4	14	4	5	6	3	18	5	1	4	10	6	6	4	4	3
590481	Clauzetto	21.83	1	0	0	0	0	0	0	0	1	1	0	0	0	0	0	0	1	0	8	22	19	39	50	0	7	9	18	34	NA	NA	NA	NA	NA	NA	NA	NA	NA	NA	NA	NA	NA	NA	NA	NA	NA	NA	NA
590487	Clauzetto	20.79	1	0	0	0	0	0	0	0	1	0	0	0	0	0	0	0	0	0	0	17	7	27	100	0	15	17	16	48	5	3	3	6	17	7	7	6	4	24	7	6	3	16	6	4	4	2	6
590530	Clauzetto	16.1	1	0	0	0	0	0	0	0	1	0	0	0	0	0	0	0	0	0	0	9	8	28	71	0	16	25	28	69	7	8	7	6	28	7	7	8	5	27	5	3	2	10	5	2	4	1	4
590548	Clauzetto	32.52	1	0	0	0	0	0	0	0	1	0	0	0	0	0	0	0	0	0	0	9	8	24	85	0	11	5	8	24	6	2	5	4	17	6	6	4	4	20	8	6	5	19	4	6	5	4	9
590556	Clauzetto	36.04	1	0	0	0	0	0	0	0	1	0	0	0	0	0	0	0	0	0	0	3	1	22	100	0	9	19	26	54	4	1	4	0	9	5	3	6	3	17	4	1	4	9	7	7	6	5	9
590564	Clauzetto	30.41	1	0	0	0	0	0	0	0	1	1	0	0	0	0	0	0	1	0	1	9	7	26	95	0	9	8	24	41	NA	NA	NA	NA	NA	NA	NA	NA	NA	NA	NA	NA	NA	NA	NA	NA	NA	NA	NA
590575	Clauzetto	10.34	1	0	0	0	0	0	0	0	1	1	0	0	0	0	0	0	1	0	1	17	23	38	65	0	17	25	20	62	8	2	5	4	19	4	3	2	4	13	4	4	4	12	4	8	4	2	10
590580	Clauzetto	17.69	1	0	0	0	0	0	0	0	1	0	0	0	0	0	0	0	0	0	0	9	6	21	100	0	11	10	15	36	6	5	5	3	19	5	6	3	4	18	7	6	4	17	2	3	5	4	8
590581	Clauzetto	33.5	1	0	0	0	0	0	0	0	1	0	0	0	0	0	0	0	0	0	0	6	0	23	90	0	11	11	20	42	4	5	4	2	15	7	4	7	3	21	5	4	3	12	5	7	6	4	10
590585	Clauzetto	20.59	1	0	0	0	0	0	0	0	1	0	0	0	0	0	0	0	0	0	0	7	NA	24	85	0	13	18	25	56	2	6	4	2	14	8	7	8	3	26	8	4	2	14	2	4	4	1	8
591541	Clauzetto	23.13	1	0	0	0	0	0	0	1	1	0	0	0	0	0	0	0	0	0	0	5	NA	24	95	0	18	9	19	46	NA	NA	NA	NA	NA	NA	NA	NA	NA	NA	NA	NA	NA	NA	NA	NA	NA	NA	NA
591578	Clauzetto	37.18	1	0	0	0	0	0	0	0	1	1	0	0	0	0	0	0	1	0	1	0	NA	22	98	1	14	10	10	34	NA	NA	NA	NA	NA	NA	NA	NA	NA	NA	NA	NA	NA	NA	NA	NA	NA	NA	NA
591661	Resia	54.83	1	0	0	0	0	0	0	1	0	1	0	0	0	0	0	0	1	0	2	34	21	40	75	0	24	13	21	58	NA	NA	NA	NA	NA	NA	NA	NA	NA	NA	NA	NA	NA	NA	NA	NA	NA	NA	NA
591683	Resia	27.01	1	0	0	0	0	0	0	1	0	0	0	0	0	0	0	0	0	0	0	15	17	40	60	0	20	22	20	62	NA	NA	NA	NA	NA	NA	NA	NA	NA	NA	NA	NA	NA	NA	NA	NA	NA	NA	NA
593526	ERTO	22.68	1	0	0	0	0	0	0	1	0	0	0	0	0	0	0	0	0	0	1	17	26	36	50	1	19	10	14	43	NA	NA	NA	NA	NA	NA	NA	NA	NA	NA	NA	NA	NA	NA	NA	NA	NA	NA	NA
593623	Resia	47.89	1	0	0	0	0	0	0	0	1	0	0	0	0	0	0	0	0	0	0	5	6	34	85	0	8	10	10	28	NA	NA	NA	NA	NA	NA	NA	NA	NA	NA	NA	NA	NA	NA	NA	NA	NA	NA	NA
594873	Illegio	21.19	1	0	0	0	0	0	0	0	1	0	0	0	0	0	0	0	0	0	0	10	6	39	40	1	12	12	16	40	5	5	3	4	17	8	4	5	2	19	5	3	1	9	3	5	6	1	7
594897	Illegio	25.38	1	0	0	0	0	0	0	0	1	0	0	0	0	0	0	0	0	0	0	7	6	35	100	1	8	10	22	40	NA	NA	NA	NA	NA	NA	NA	NA	NA	NA	NA	NA	NA	NA	NA	NA	NA	NA	NA
595000	Illegio	20.33	1	0	0	0	0	0	0	0	1	0	0	0	0	0	0	0	0	0	0	6	0	22	81	0	7	20	16	43	6	0	4	1	11	4	5	5	3	17	4	2	5	11	7	7	8	5	9
595018	Illegio	16.72	1	0	0	0	0	0	0	0	1	0	0	0	0	0	0	0	0	0	0	8	6	25	92	0	22	15	24	61	NA	NA	NA	NA	NA	NA	NA	NA	NA	NA	NA	NA	NA	NA	NA	NA	NA	NA	NA
595021	Illegio	28.45	1	0	0	0	0	0	0	0	1	0	0	0	0	0	0	0	0	0	0	2	0	19	100	0	7	16	16	39	3	2	5	2	12	6	5	7	4	22	6	7	5	18	5	8	6	3	7
595036	Illegio	16.74	1	0	0	0	0	0	0	0	1	0	0	0	0	0	0	0	0	0	0	3	0	20	100	0	7	9	18	34	4	4	3	2	13	4	2	2	1	9	4	8	2	14	5	6	6	4	4
595037	Illegio	16.45	1	0	0	0	0	0	0	0	1	1	0	0	0	0	0	0	1	0	2	9	8	24	85	0	14	23	17	54	NA	NA	NA	NA	NA	NA	NA	NA	NA	NA	NA	NA	NA	NA	NA	NA	NA	NA	NA
595041	Illegio	21.27	1	0	0	0	0	0	0	1	0	0	0	0	0	0	0	0	0	0	0	12	14	23	71	0	18	21	22	61	3	5	4	4	16	6	6	4	8	24	5	2	1	8	4	5	5	3	8
595044	Illegio	35.91	1	0	0	0	0	0	0	0	1	1	0	0	0	0	0	0	1	0	1	6	7	28	100	0	11	7	12	30	9	5	6	3	23	4	5	2	0	11	8	7	5	20	6	7	4	5	5
595047	Illegio	52.57	1	0	0	0	0	0	0	0	1	0	0	0	0	0	0	0	0	0	0	7	0	23	95	0	7	13	16	36	NA	NA	NA	NA	NA	NA	NA	NA	NA	NA	NA	NA	NA	NA	NA	NA	NA	NA	NA
595049	Illegio	14.32	1	0	0	0	0	0	0	0	1	0	0	0	0	0	0	0	0	0	0	4	0	19	90	0	7	11	20	38	NA	NA	NA	NA	NA	NA	NA	NA	NA	NA	NA	NA	NA	NA	NA	NA	NA	NA	NA
595051	Illegio	7.25	1	0	0	0	0	0	0	0	1	1	0	0	0	0	0	0	1	0	1	6	0	18	81	0	21	17	14	52	5	0	4	1	10	5	7	4	7	23	5	4	2	11	3	4	4	5	7
595064	Illegio	3.53	1	0	0	0	0	0	0	0	1	0	0	0	0	0	0	0	0	0	0	8	10	23	95	0	7	25	16	48	7	3	5	5	20	6	1	1	4	12	4	3	1	8	5	6	6	5	8
598843	Resia	8.2	1	0	0	0	0	0	0	0	1	0	0	0	0	0	0	0	0	0	0	0	0	18	100	0	11	9	30	50	NA	NA	NA	NA	NA	NA	NA	NA	NA	NA	NA	NA	NA	NA	NA	NA	NA	NA	NA
598880	Resia	22.28	1	0	0	0	0	0	0	1	0	0	0	0	0	0	0	0	0	0	0	16	18	37	85	1	15	5	19	39	NA	NA	NA	NA	NA	NA	NA	NA	NA	NA	NA	NA	NA	NA	NA	NA	NA	NA	NA
598881	Resia	34.88	1	0	0	0	0	0	0	0	1	0	0	0	0	0	0	0	0	0	0	12	12	28	75	1	19	16	14	49	NA	NA	NA	NA	NA	NA	NA	NA	NA	NA	NA	NA	NA	NA	NA	NA	NA	NA	NA
598971	Resia	43.28	1	0	0	0	0	0	0	1	0	1	0	0	0	0	0	0	1	0	2	43	27	43	70	0	32	17	25	74	NA	NA	NA	NA	NA	NA	NA	NA	NA	NA	NA	NA	NA	NA	NA	NA	NA	NA	NA
598976	Resia	54.13	1	0	0	0	0	0	0	1	0	0	0	0	0	0	0	0	0	0	0	12	17	36	100	0	15	8	9	32	NA	NA	NA	NA	NA	NA	NA	NA	NA	NA	NA	NA	NA	NA	NA	NA	NA	NA	NA
599119	Resia	8.26	1	0	0	0	0	0	0	1	0	1	0	0	0	0	0	0	1	0	1	19	17	38	85	0	15	16	18	49	NA	NA	NA	NA	NA	NA	NA	NA	NA	NA	NA	NA	NA	NA	NA	NA	NA	NA	NA
599229	Resia	27.83	1	0	0	0	0	0	0	1	NA	1	0	0	0	0	0	0	1	0	4	43	29	38	70	1	27	20	26	73	7	4	7	8	26	10	6	6	8	30	8	2	4	14	4	1	1	1	1
599235	Resia	16.5	1	0	0	0	0	0	0	0	1	0	0	0	0	0	0	0	0	0	0	32	13	42	100	1	15	6	17	38	NA	NA	NA	NA	NA	NA	NA	NA	NA	NA	NA	NA	NA	NA	NA	NA	NA	NA	NA
599331	Resia	20.4	1	0	0	0	0	0	0	1	0	0	0	0	0	0	0	0	0	0	0	30	26	47	61	0	15	23	18	56	3	4	5	4	16	5	5	6	2	18	8	3	2	13	6	6	4	5	8
599345	Resia	15.52	1	0	0	0	0	0	0	0	1	0	0	0	0	0	0	0	0	0	0	14	9	26	95	0	19	25	12	56	4	4	2	1	11	7	6	4	4	21	8	1	2	11	5	6	6	3	6
599374	Resia	25.03	1	0	0	0	0	0	0	1	0	0	0	0	0	0	0	0	0	0	0	9	4	25	90	0	7	6	20	33	NA	NA	NA	NA	NA	NA	NA	NA	NA	NA	NA	NA	NA	NA	NA	NA	NA	NA	NA
599414	Resia	23.72	1	0	0	0	0	0	0	0	1	1	1	0	0	0	0	0	0	0	1	10	4	26	98	1	7	25	30	62	1	2	3	2	8	4	5	5	2	16	7	1	4	12	7	4	5	5	6
599438	Resia	20.1	1	0	0	0	0	0	0	1	0	1	0	0	0	0	0	0	1	0	1	35	28	43	61	1	15	13	28	56	4	5	3	4	16	4	3	4	4	15	5	5	3	13	3	3	4	1	3
599441	Resia	12.37	1	0	0	0	0	0	0	0	1	1	0	0	0	0	0	NA	0	1	0	14	7	41	100	0	21	13	24	58	6	6	4	6	22	3	5	4	3	15	7	6	2	15	6	3	3	4	4
599469	Resia	24.33	1	0	0	0	0	0	0	0	1	0	0	0	0	0	0	0	0	0	0	0	0	48	NA	0	NA	NA	NA	NA	NA	NA	NA	NA	NA	NA	NA	NA	NA	NA	NA	NA	NA	NA	NA	NA	NA	NA	NA
582175	ERTO	20.93	1	0	0	1	0	0	0	1	0	1	0	0	0	0	0	0	1	0	1	7	1	24	95	0	11	17	31	59	5	6	2	3	16	4	4	8	3	19	8	1	3	12	2	4	3	3	6
582282	SanMartino	30.07	1	0	0	1	0	0	0	0	0	0	0	0	0	0	0	0	0	0	0	2	2	21	95	0	10	9	15	34	6	4	4	3	17	8	4	6	5	23	4	6	4	14	3	8	3	4	6
591533	Clauzetto	35.51	1	0	0	1	0	0	0	0	1	0	0	0	0	0	0	0	0	0	0	5	0	21	100	0	15	5	14	34	3	0	6	2	11	4	5	5	2	16	5	8	4	17	4	6	5	1	8
591540	Clauzetto	20.62	1	0	0	1	0	0	0	1	0	0	0	0	0	0	0	0	0	0	0	4	NA	23	70	0	13	9	14	36	NA	NA	NA	NA	NA	NA	NA	NA	NA	NA	NA	NA	NA	NA	NA	NA	NA	NA	NA
591560	Clauzetto	16.67	1	0	0	1	0	0	0	0	0	1	0	0	0	0	1	0	1	0	1	4	NA	21	90	1	20	19	20	59	NA	NA	NA	NA	NA	NA	NA	NA	NA	NA	NA	NA	NA	NA	NA	NA	NA	NA	NA
594861	Illegio	18.61	1	0	0	1	0	0	0	0	0	0	0	0	0	0	0	0	0	0	0	5	3	19	91	0	17	16	18	51	NA	NA	NA	NA	NA	NA	NA	NA	NA	NA	NA	NA	NA	NA	NA	NA	NA	NA	NA
599360	Resia	39.04	1	0	0	1	0	0	0	0	0	0	0	0	0	0	0	0	0	0	0	5	5	33	81	1	27	19	22	68	NA	NA	NA	NA	NA	NA	NA	NA	NA	NA	NA	NA	NA	NA	NA	NA	NA	NA	NA
582053	SanMartino	30.05	1	0	0	0	1	0	0	0	0	0	0	0	0	0	0	0	0	0	0	7	4	28	81	0	12	11	13	36	3	5	0	4	12	3	3	5	0	11	2	1	1	4	7	6	6	5	8
582090	SanMartino	27.76	1	0	0	0	1	0	1	0	0	0	0	0	0	0	0	0	0	0	0	21	19	43	65	0	15	16	13	44	5	3	6	7	21	1	2	3	3	9	7	6	5	18	4	5	3	3	0
590467	Sauris	10.25	1	0	0	0	1	0	0	0	NA	1	0	0	0	0	0	0	1	NA	3	2	1	18	85	1	10	8	13	31	6	3	3	3	15	4	5	3	3	15	6	5	3	14	2	6	8	4	7
582106	ERTO	16.37	1	1	0	0	0	0	0	1	0	0	0	0	0	0	0	0	0	0	0	16	9	26	91	0	19	20	25	64	NA	NA	NA	NA	NA	NA	NA	NA	NA	NA	NA	NA	NA	NA	NA	NA	NA	NA	NA
582140	ERTO	20.97	1	1	0	0	0	0	0	0	0	0	0	0	0	0	0	0	0	0	0	29	19	35	100	0	19	13	25	57	1	3	1	4	9	6	6	4	4	20	7	4	3	14	4	4	2	4	4
582156	ERTO	16.04	1	1	0	0	0	0	0	0	0	0	0	0	0	0	0	0	0	0	0	21	17	43	81	0	NA	NA	NA	NA	NA	NA	NA	NA	NA	NA	NA	NA	NA	NA	NA	NA	NA	NA	NA	NA	NA	NA	NA
582163	ERTO	35.2	1	1	0	0	0	0	0	0	1	0	0	0	0	0	0	0	0	0	0	15	5	25	100	1	8	16	14	38	NA	NA	NA	NA	NA	NA	NA	NA	NA	NA	NA	NA	NA	NA	NA	NA	NA	NA	NA
582169	ERTO	33.84	1	1	0	0	0	0	0	0	0	0	0	0	0	0	0	0	0	0	0	13	6	31	82	0	15	15	25	55	1	5	3	2	11	2	6	3	4	15	7	3	1	11	4	8	6	3	7
582207	SanMartino	26.54	1	1	0	0	0	0	0	0	0	0	0	0	0	0	0	0	0	0	0	10	7	26	71	0	8	14	13	35	6	3	1	3	13	4	3	3	3	13	8	2	5	15	7	6	6	4	10
582233	SanMartino	34.92	1	1	0	0	0	0	0	0	0	0	0	0	0	0	0	0	0	0	0	18	11	33	61	1	18	21	17	56	4	5	6	6	21	9	7	8	6	30	9	3	4	16	8	2	3	4	5
582235	SanMartino	22.01	1	1	0	0	0	0	0	0	0	0	0	0	0	0	0	0	0	0	0	12	10	28	61	1	30	14	32	76	NA	NA	NA	NA	NA	NA	NA	NA	NA	NA	NA	NA	NA	NA	NA	NA	NA	NA	NA
582271	SanMartino	57.2	1	1	0	0	0	0	0	0	0	1	1	0	0	0	0	0	0	0	1	14	13	35	90	0	8	10	15	33	NA	NA	NA	NA	NA	NA	NA	NA	NA	NA	NA	NA	NA	NA	NA	NA	NA	NA	NA
590450	Clauzetto	24.22	1	1	0	0	0	0	0	0	0	0	0	0	0	0	0	0	0	0	0	7	3	21	100	0	18	11	24	53	10	7	3	8	28	4	1	0	0	5	9	6	3	18	5	5	6	4	1
590459	Clauzetto	36.95	1	1	0	0	0	0	0	0	0	1	0	0	0	0	0	0	1	0	30	12	1	26	81	0	16	15	29	60	5	7	3	3	18	11	7	8	8	34	4	2	1	7	2	2	4	1	7
590468	Sauris	4.43	1	1	0	0	0	0	0	0	NA	1	0	0	0	0	0	0	1	NA	5	8	6	23	78	0	13	15	17	45	4	9	2	8	23	7	7	6	6	26	6	4	5	15	4	2	3	1	8
590562	Clauzetto	23.5	1	1	0	0	0	0	0	0	0	1	0	0	0	0	0	0	1	1	5	13	NA	27	75	0	27	9	22	58	7	3	3	3	16	10	6	4	8	28	7	3	1	11	5	3	2	2	6
590584	Clauzetto	14.53	1	1	0	0	0	0	0	0	0	1	0	0	0	0	0	0	1	0	1	20	NA	21	75	0	11	9	22	42	10	4	5	3	22	5	7	3	7	22	9	5	3	17	3	6	5	3	10
590586	Clauzetto	14.25	1	1	0	0	0	0	0	0	0	0	0	0	0	0	0	0	0	0	0	10	NA	27	90	0	12	10	28	50	3	3	4	0	10	6	6	3	1	16	9	2	1	12	6	7	6	5	9
590589	Clauzetto	22.75	1	1	0	0	0	0	0	1	0	0	0	0	0	0	0	0	0	0	0	27	33	48	55	0	33	21	13	67	7	4	3	3	17	10	4	6	4	24	10	5	4	19	6	2	4	3	5
590592	Clauzetto	10.45	1	1	0	0	0	0	0	0	0	0	0	0	0	0	0	0	0	0	0	16	11	38	82	0	15	9	8	32	3	5	2	4	14	10	7	3	4	24	8	4	2	14	7	1	5	1	6
590594	Clauzetto	22.04	1	1	0	0	0	0	0	0	0	1	0	0	0	0	0	0	1	1	15	17	8	18	90	0	20	24	26	70	5	7	8	6	26	5	4	7	7	23	4	1	4	9	2	5	2	1	8
591047	Sauris	13.53	1	1	0	0	0	0	0	0	NA	1	0	0	0	0	0	0	1	NA	1	8	5	24	82	0	16	12	20	48	NA	NA	NA	NA	NA	NA	NA	NA	NA	NA	NA	NA	NA	NA	NA	NA	NA	NA	NA
591062	Sauris	32.59	1	1	0	0	0	0	0	0	NA	0	0	0	0	0	0	0	0	NA	1	19	14	30	68	0	27	15	14	56	4	2	2	4	12	8	7	8	5	28	2	1	2	5	6	3	3	1	6
591064	Sauris	9.49	1	1	0	0	0	0	0	0	NA	1	1	0	0	0	0	0	0	NA	NA	19	14	27	85	0	22	16	12	50	6	6	5	4	21	5	2	4	8	19	9	6	3	18	4	3	8	3	9
591065	Sauris	28.35	1	1	0	0	0	0	0	0	NA	0	0	0	0	0	0	0	0	NA	0	4	4	22	85	0	7	21	16	44	3	3	4	4	14	7	7	6	7	27	10	5	5	20	2	6	4	3	6
591075	Sauris	19.04	1	1	0	0	0	0	0	0	NA	0	0	0	0	0	0	0	0	NA	0	9	8	24	75	0	23	23	26	72	2	3	5	3	13	5	4	5	5	19	7	3	0	10	5	1	3	0	2
591084	Sauris	11.67	1	1	0	0	0	0	0	0	NA	1	0	0	0	0	0	0	1	NA	1	7	6	25	81	0	13	25	20	58	5	4	0	5	14	8	5	6	3	22	9	2	2	13	6	6	3	1	3
591085	Sauris	24.24	1	1	0	0	0	0	0	0	NA	1	0	0	0	0	0	0	1	NA	1	27	29	45	31	0	35	25	21	81	5	7	6	6	24	7	3	3	7	20	6	4	3	13	6	1	2	2	2
591099	Sauris	11.33	1	1	0	0	0	0	0	0	NA	1	1	0	0	0	0	0	0	NA	NA	4	2	22	98	0	18	15	17	50	5	4	6	1	16	3	5	3	4	15	4	4	4	12	5	8	7	4	8
591100	Sauris	22.1	1	1	0	0	0	0	0	0	NA	1	0	0	0	0	0	0	1	NA	5	4	9	28	85	0	13	9	22	44	7	4	4	5	20	5	2	2	3	12	8	5	6	19	3	5	3	4	6
591518	Clauzetto	22.36	1	1	0	0	0	0	0	1	0	0	0	0	0	0	0	0	0	0	0	16	17	30	70	0	17	13	21	51	6	8	5	2	21	6	7	5	8	26	9	4	4	17	4	0	1	3	8
591519	Clauzetto	18.89	1	1	0	0	0	0	0	0	0	0	0	0	0	0	0	0	0	0	0	14	7	25	85	0	14	17	23	54	NA	NA	NA	NA	NA	NA	NA	NA	NA	NA	NA	NA	NA	NA	NA	NA	NA	NA	NA
591521	Clauzetto	16.02	1	1	0	0	0	0	0	0	0	1	0	0	0	0	0	0	1	0	1	15	7	29	82	0	14	16	22	52	NA	NA	NA	NA	NA	NA	NA	NA	NA	NA	NA	NA	NA	NA	NA	NA	NA	NA	NA
591525	Clauzetto	32.21	1	1	0	0	0	0	0	0	0	0	0	0	0	0	0	0	0	0	0	9	12	26	85	0	33	10	14	57	NA	NA	NA	NA	NA	NA	NA	NA	NA	NA	NA	NA	NA	NA	NA	NA	NA	NA	NA
591536	Clauzetto	38.82	1	1	0	0	0	0	0	0	0	0	0	0	0	0	0	0	0	0	0	12	8	26	81	0	17	13	21	51	NA	NA	NA	NA	NA	NA	NA	NA	NA	NA	NA	NA	NA	NA	NA	NA	NA	NA	NA
591604	Sauris	3.1	1	1	0	0	0	0	0	0	NA	1	1	0	0	0	0	0	0	NA	1	18	18	37	60	1	18	12	17	47	6	4	2	6	18	3	5	1	5	14	7	1	2	10	5	4	6	5	10
591618	Sauris	25.28	1	1	0	0	0	0	0	0	NA	1	0	0	0	0	0	0	1	NA	1	15	14	27	80	0	19	25	9	53	NA	NA	NA	NA	NA	NA	NA	NA	NA	NA	NA	NA	NA	NA	NA	NA	NA	NA	NA
591637	Sauris	6.31	1	1	0	0	0	0	0	0	NA	1	0	0	0	0	0	0	1	NA	1	15	15	29	85	1	17	23	22	62	NA	NA	NA	NA	NA	NA	NA	NA	NA	NA	NA	NA	NA	NA	NA	NA	NA	NA	NA
591647	Sauris	17.28	1	1	0	0	0	0	0	0	NA	0	0	0	0	0	0	0	0	NA	0	0	0	18	95	0	31	17	18	66	8	4	5	2	19	4	3	2	3	12	5	3	2	10	6	5	5	5	9
591690	Resia	17.82	1	1	0	0	0	0	0	0	0	1	1	0	0	0	0	0	0	1	1	24	9	26	100	1	7	5	14	26	NA	NA	NA	NA	NA	NA	NA	NA	NA	NA	NA	NA	NA	NA	NA	NA	NA	NA	NA
593511	ERTO	13.48	1	1	0	0	0	0	0	1	0	1	1	0	0	0	0	0	0	1	5	21	15	45	60	0	27	13	32	72	6	7	6	5	24	8	5	3	8	24	8	8	3	19	4	3	3	1	1
593523	ERTO	32.2	1	1	0	0	0	0	0	0	0	0	0	0	0	0	0	0	0	0	5	21	16	20	95	0	13	10	12	35	10	5	5	4	24	2	5	3	4	14	9	2	5	16	7	8	4	4	7
593613	Resia	25.91	1	1	0	0	0	0	0	0	0	0	0	0	0	0	0	0	0	0	0	1	0	18	90	0	23	21	28	72	NA	NA	NA	NA	NA	NA	NA	NA	NA	NA	NA	NA	NA	NA	NA	NA	NA	NA	NA
593691	Resia	18.98	1	1	0	0	0	0	0	0	0	0	0	0	0	0	0	0	0	0	0	6	5	23	85	0	7	5	21	33	NA	NA	NA	NA	NA	NA	NA	NA	NA	NA	NA	NA	NA	NA	NA	NA	NA	NA	NA
594894	Illegio	39.73	1	1	0	0	0	0	0	0	0	1	0	0	0	1	0	0	1	0	1	8	5	20	75	1	11	14	21	46	2	3	3	7	15	9	7	6	7	29	6	6	5	17	4	8	6	5	5
595012	Illegio	37.73	1	1	0	0	0	0	0	0	0	0	0	0	0	0	0	0	0	0	0	10	10	29	81	0	9	12	22	43	5	3	5	2	15	7	6	8	0	21	9	8	6	23	6	7	7	2	4
595031	Illegio	25.13	1	1	0	0	0	0	0	0	0	1	0	0	0	0	0	0	1	0	2	8	7	24	82	0	11	5	24	40	4	7	5	6	22	7	7	5	2	21	8	5	1	14	2	6	5	4	10
595040	Illegio	23.64	1	1	0	0	0	0	0	0	0	0	0	0	0	0	0	0	0	0	0	7	10	21	75	0	10	5	21	36	5	3	4	4	16	6	5	2	4	17	9	3	1	13	6	7	4	5	4
595048	Illegio	5.68	1	1	0	0	0	0	0	0	1	1	0	0	0	0	0	0	1	0	1	10	9	32	81	0	16	18	8	42	4	1	6	2	13	5	5	5	4	19	6	5	5	16	7	5	7	5	6
595050	Illegio	22.36	1	1	0	0	0	0	0	0	0	0	0	0	0	0	0	0	0	0	0	9	8	24	82	0	15	17	16	48	6	1	2	3	12	9	7	7	0	23	9	3	4	16	7	5	6	5	2
595055	Illegio	21.29	1	1	0	0	0	0	0	0	0	0	0	0	0	0	0	0	0	0	0	5	8	24	99	0	7	10	10	27	NA	NA	NA	NA	NA	NA	NA	NA	NA	NA	NA	NA	NA	NA	NA	NA	NA	NA	NA
599151	Sauris	33.02	1	1	0	0	0	0	0	0	NA	1	1	0	0	0	0	0	1	NA	20	25	15	33	65	0	21	12	20	53	3	6	2	4	15	4	4	5	6	19	6	4	2	12	5	3	5	2	7
599159	Sauris	41.41	1	1	0	0	0	0	0	0	NA	0	0	0	0	0	0	0	0	NA	1	2	6	26	85	0	15	21	32	68	5	4	1	7	17	4	4	2	8	18	6	1	1	8	4	5	4	2	5
599161	Sauris	37.73	1	1	0	0	0	0	0	0	NA	0	0	0	0	0	0	0	0	NA	0	7	7	21	82	0	17	17	10	44	NA	NA	NA	NA	NA	NA	NA	NA	NA	NA	NA	NA	NA	NA	NA	NA	NA	NA	NA
599168	Sauris	23.89	1	1	0	0	0	0	0	0	NA	1	0	0	0	0	0	0	1	NA	1	2	4	22	85	0	11	17	14	42	4	3	4	4	15	2	5	3	3	13	5	5	3	13	4	7	4	3	9
599170	Sauris	41.76	1	1	0	0	0	0	0	0	NA	1	0	0	0	0	0	0	1	NA	1	10	13	25	81	0	9	5	12	26	5	6	5	2	18	5	6	4	3	18	7	4	4	15	5	6	4	4	10
599172	Sauris	13.37	1	1	0	0	0	0	0	0	NA	0	0	0	0	0	0	0	0	NA	0	5	0	21	100	0	11	5	20	36	7	7	2	5	21	9	6	3	1	19	6	4	3	13	4	8	4	5	11
599173	Sauris	17.49	1	1	0	0	0	0	0	0	NA	1	0	0	0	0	0	0	1	NA	2	3	0	20	65	0	12	13	16	41	NA	NA	NA	NA	NA	NA	NA	NA	NA	NA	NA	NA	NA	NA	NA	NA	NA	NA	NA
599174	Sauris	24.91	1	1	0	0	0	0	0	0	NA	0	0	0	0	0	0	0	0	NA	1	5	3	22	90	0	11	15	8	34	3	2	7	4	16	7	7	7	4	25	6	4	3	13	5	4	4	2	6
599277	Resia	25.71	1	1	0	0	0	0	0	0	0	0	0	0	0	0	0	0	0	0	0	29	21	36	100	0	19	5	12	36	4	6	7	8	25	6	5	1	2	14	9	7	3	19	5	5	5	3	9
599521	Resia	26.67	1	1	0	0	0	0	0	0	0	0	0	0	0	0	0	0	0	0	0	0	1	18	90	0	10	9	18	37	2	4	2	2	10	2	6	6	3	17	6	0	2	8	4	8	7	4	9
591105	Sauris	61.61	1	1	0	1	0	0	0	0	NA	0	0	0	0	0	0	0	0	NA	0	6	10	28	65	0	19	21	14	54	1	7	8	3	19	7	4	7	1	19	8	3	4	15	7	2	3	3	3
582221	SanMartino	19.21	1	1	0	0	1	0	0	0	1	0	0	0	0	0	0	0	0	0	0	9	7	23	88	0	24	13	20	57	3	3	4	3	13	6	6	2	6	20	8	3	3	14	3	3	4	1	6
582002	SanMartino	27.88	1	0	1	0	0	0	0	0	0	0	0	0	0	0	0	0	0	0	0	10	5	24	95	0	24	17	24	65	NA	NA	NA	NA	NA	NA	NA	NA	NA	NA	NA	NA	NA	NA	NA	NA	NA	NA	NA
582016	SanMartino	28.42	1	0	1	0	0	0	0	0	0	0	0	0	0	0	0	0	0	0	0	5	4	20	98	0	8	7	14	29	4	2	6	3	15	6	5	4	5	20	8	7	5	20	5	8	8	4	8
582019	SanMartino	36.77	1	0	1	0	0	0	0	0	0	1	0	0	0	0	1	0	0	0	1	2	0	18	86	0	13	11	20	44	4	5	3	6	18	4	5	6	1	16	8	7	2	17	6	5	6	5	4
582058	SanMartino	31	1	0	1	0	0	0	0	0	0	0	0	0	0	0	0	0	0	0	0	0	1	18	89	0	19	17	22	58	5	4	6	3	18	5	7	8	3	23	7	4	5	16	2	6	6	4	5
582070	SanMartino	47.7	1	0	1	0	0	0	1	0	0	1	0	0	0	0	0	0	1	0	1	7	4	23	92	0	23	19	20	62	6	5	8	7	26	10	4	5	5	24	8	2	2	12	5	4	3	1	5
582077	SanMartino	43.09	1	0	1	0	0	0	0	0	0	0	0	0	0	0	0	0	1	0	2	15	14	28	55	0	32	15	18	65	5	4	7	5	21	9	7	4	9	29	10	5	5	20	5	1	3	0	4
582226	SanMartino	33.13	1	0	1	0	0	0	0	0	0	0	0	0	0	0	0	0	0	0	0	3	1	19	90	0	18	11	23	52	NA	NA	NA	NA	NA	NA	NA	NA	NA	NA	NA	NA	NA	NA	NA	NA	NA	NA	NA
582257	SanMartino	17.26	1	0	1	0	0	0	0	0	0	0	0	0	0	0	0	0	0	0	0	3	0	20	85	0	13	15	21	49	3	4	2	3	12	9	6	6	5	26	5	3	3	11	4	7	6	4	5
582292	SanMartino	36.05	1	0	1	0	0	0	0	0	0	0	0	0	0	0	0	0	0	0	0	10	7	25	88	0	13	10	29	52	NA	NA	NA	NA	NA	NA	NA	NA	NA	NA	NA	NA	NA	NA	NA	NA	NA	NA	NA
590447	Clauzetto	30.67	1	0	1	0	0	0	0	0	0	0	0	0	0	0	0	0	0	0	0	16	7	29	100	0	10	11	18	39	5	3	5	6	19	5	4	1	2	12	6	6	4	16	6	6	6	5	7
590476	Clauzetto	20.23	1	0	1	0	0	0	0	0	0	0	0	0	0	0	0	0	0	0	0	22	9	33	100	0	7	9	17	33	NA	NA	NA	NA	NA	NA	NA	NA	NA	NA	NA	NA	NA	NA	NA	NA	NA	NA	NA
590486	Clauzetto	18.93	1	0	1	0	0	0	0	0	0	0	0	0	0	0	0	0	0	0	0	24	12	32	100	1	31	25	26	82	NA	NA	NA	NA	NA	NA	NA	NA	NA	NA	NA	NA	NA	NA	NA	NA	NA	NA	NA
590503	Clauzetto	24.58	1	0	1	0	0	0	0	0	0	0	0	0	0	0	0	0	0	0	0	3	1	21	91	0	9	10	12	31	NA	NA	NA	NA	NA	NA	NA	NA	NA	NA	NA	NA	NA	NA	NA	NA	NA	NA	NA
590505	Clauzetto	29.25	1	0	1	0	0	0	0	0	0	1	0	0	0	0	0	0	1	1	1	10	5	25	100	0	15	17	14	46	NA	NA	NA	NA	NA	NA	NA	NA	NA	NA	NA	NA	NA	NA	NA	NA	NA	NA	NA
590509	Clauzetto	22.11	1	0	1	0	0	0	0	0	0	0	0	0	0	0	0	0	0	0	0	9	1	25	100	1	11	10	18	39	2	4	5	3	14	5	6	6	4	21	7	6	4	17	4	5	5	5	9
590512	Clauzetto	20.73	1	0	1	0	0	0	0	0	0	0	0	0	0	0	0	0	0	0	0	14	12	38	100	1	15	17	8	40	8	2	4	5	19	1	3	6	2	12	9	1	1	11	7	5	2	4	9
590523	Clauzetto	31.09	1	0	1	0	0	0	0	0	0	0	0	0	0	0	0	0	0	0	0	23	8	27	95	0	18	17	27	62	NA	NA	NA	NA	NA	NA	NA	NA	NA	NA	NA	NA	NA	NA	NA	NA	NA	NA	NA
590552	Clauzetto	39.67	1	0	1	0	0	0	1	1	0	0	0	0	0	0	0	0	0	0	0	17	28	41	70	1	13	16	12	41	4	4	6	3	17	7	5	4	3	19	3	2	5	10	2	6	3	3	8
591556	Clauzetto	27.91	1	0	1	0	0	0	0	0	0	1	0	0	0	0	0	0	1	0	1	1	NA	18	100	0	11	5	23	39	NA	NA	NA	NA	NA	NA	NA	NA	NA	NA	NA	NA	NA	NA	NA	NA	NA	NA	NA
591565	Clauzetto	32.97	1	0	1	0	0	0	0	0	0	1	0	0	0	1	1	0	1	0	1	3	NA	18	100	1	13	6	17	36	NA	NA	NA	NA	NA	NA	NA	NA	NA	NA	NA	NA	NA	NA	NA	NA	NA	NA	NA
591567	Clauzetto	13.98	1	0	1	0	0	0	0	0	0	1	0	0	0	0	1	0	0	0	1	1	NA	18	100	0	17	14	20	51	NA	NA	NA	NA	NA	NA	NA	NA	NA	NA	NA	NA	NA	NA	NA	NA	NA	NA	NA
591568	Clauzetto	27.53	1	0	1	0	0	0	0	0	0	1	0	0	0	0	0	0	1	1	1	4	NA	20	61	0	29	22	24	75	NA	NA	NA	NA	NA	NA	NA	NA	NA	NA	NA	NA	NA	NA	NA	NA	NA	NA	NA
591572	Clauzetto	24.63	1	0	1	0	0	0	0	0	0	1	0	0	0	0	1	0	1	0	2	3	NA	18	98	0	30	20	19	69	NA	NA	NA	NA	NA	NA	NA	NA	NA	NA	NA	NA	NA	NA	NA	NA	NA	NA	NA
591595	Sauris	49.2	1	0	1	0	0	0	0	0	NA	1	0	0	0	0	1	0	1	NA	2	3	3	19	98	1	14	14	13	41	NA	NA	NA	NA	NA	NA	NA	NA	NA	NA	NA	NA	NA	NA	NA	NA	NA	NA	NA
591602	Sauris	13.09	1	0	1	0	0	0	0	0	NA	1	0	0	0	0	0	0	1	NA	1	2	4	20	100	1	15	19	18	52	NA	NA	NA	NA	NA	NA	NA	NA	NA	NA	NA	NA	NA	NA	NA	NA	NA	NA	NA
591621	Sauris	9.94	1	0	1	0	0	0	0	0	NA	1	1	0	0	0	1	0	1	NA	NA	4	2	21	90	0	14	9	17	40	9	2	5	3	19	6	5	3	1	15	7	5	4	16	5	6	7	5	4
591623	Sauris	28.64	1	0	1	0	0	0	0	0	NA	0	0	0	0	0	0	0	0	NA	0	1	0	18	100	0	21	21	18	60	9	1	6	7	23	4	6	5	1	16	6	2	4	12	5	5	2	3	4
591640	Sauris	9.65	1	0	1	0	0	0	0	0	NA	1	0	0	0	0	0	0	1	NA	1	11	15	32	86	0	14	25	30	69	4	3	3	2	12	2	4	3	1	10	2	0	1	3	2	7	4	4	6
591642	Sauris	18.29	1	0	1	0	0	0	0	0	NA	0	0	0	0	0	0	0	0	NA	0	4	3	21	95	0	10	25	19	54	NA	NA	NA	NA	NA	NA	NA	NA	NA	NA	NA	NA	NA	NA	NA	NA	NA	NA	NA
591699	Resia	20.77	1	0	1	0	0	0	0	0	0	1	0	0	0	0	1	0	0	0	NA	7	3	21	100	1	13	9	21	43	NA	NA	NA	NA	NA	NA	NA	NA	NA	NA	NA	NA	NA	NA	NA	NA	NA	NA	NA
593626	Resia	4.31	1	0	1	0	0	0	0	0	0	0	0	0	0	0	0	0	0	0	0	6	5	21	85	0	13	18	18	49	NA	NA	NA	NA	NA	NA	NA	NA	NA	NA	NA	NA	NA	NA	NA	NA	NA	NA	NA
593693	Resia	13.86	1	0	1	0	0	0	0	0	0	0	0	0	0	0	0	0	0	0	0	3	1	19	90	0	19	10	16	45	NA	NA	NA	NA	NA	NA	NA	NA	NA	NA	NA	NA	NA	NA	NA	NA	NA	NA	NA
594847	Illegio	15.07	1	0	1	0	0	0	0	0	0	1	0	0	0	0	0	0	1	0	1	10	5	27	87	0	11	14	20	45	0	3	3	1	7	7	7	8	6	28	5	2	4	11	3	4	6	4	7
594862	Illegio	5.59	1	0	1	0	0	0	0	0	0	0	0	0	0	0	0	0	0	0	0	12	8	32	95	0	19	21	24	64	NA	NA	NA	NA	NA	NA	NA	NA	NA	NA	NA	NA	NA	NA	NA	NA	NA	NA	NA
594883	Illegio	8.7	1	0	1	0	0	0	0	0	0	1	0	0	0	0	0	0	1	0	7	8	5	27	75	1	11	17	28	56	NA	NA	NA	NA	NA	NA	NA	NA	NA	NA	NA	NA	NA	NA	NA	NA	NA	NA	NA
594899	Illegio	16.29	1	0	1	0	0	0	0	0	0	0	0	0	0	0	0	0	0	0	0	1	3	18	90	0	22	15	23	60	10	7	6	2	25	4	4	2	0	10	6	1	3	10	3	6	2	1	4
594910	Illegio	20.68	1	0	1	0	0	0	0	0	0	1	0	0	0	0	0	0	1	0	1	2	0	12	98	0	10	6	13	29	NA	NA	NA	NA	NA	NA	NA	NA	NA	NA	NA	NA	NA	NA	NA	NA	NA	NA	NA
594911	Illegio	27.51	1	0	1	0	0	0	0	0	0	0	0	0	0	0	0	0	0	0	0	3	3	18	86	1	21	18	22	61	NA	NA	NA	NA	NA	NA	NA	NA	NA	NA	NA	NA	NA	NA	NA	NA	NA	NA	NA
594928	Illegio	26.23	1	0	1	0	0	0	0	0	1	0	0	0	0	0	0	0	0	0	0	13	11	30	89	0	8	14	30	52	4	4	5	1	14	7	4	4	0	15	5	1	2	8	5	5	5	5	10
594930	Illegio	21.74	1	0	1	0	0	0	0	0	0	1	1	0	0	0	0	0	0	0	1	7	5	20	98	0	13	17	18	48	NA	NA	NA	NA	NA	NA	NA	NA	NA	NA	NA	NA	NA	NA	NA	NA	NA	NA	NA
594957	Illegio	26.11	1	0	1	0	0	0	0	0	0	1	1	0	0	1	0	0	0	0	1	10	6	25	90	0	32	13	18	63	NA	NA	NA	NA	NA	NA	NA	NA	NA	NA	NA	NA	NA	NA	NA	NA	NA	NA	NA
594963	Illegio	33.76	1	0	1	0	0	0	0	0	0	0	0	0	0	0	0	0	0	0	0	16	13	28	89	0	19	13	22	54	2	4	5	4	15	7	6	4	3	20	9	3	2	14	3	7	NA	3	8
594967	Illegio	17.22	1	0	1	0	0	0	0	0	0	0	0	0	0	0	0	0	0	0	0	7	4	21	95	0	21	11	20	52	NA	NA	NA	NA	NA	NA	NA	NA	NA	NA	NA	NA	NA	NA	NA	NA	NA	NA	NA
594968	Illegio	22.52	1	0	1	0	0	0	0	0	0	0	0	0	0	0	0	0	0	0	0	1	0	18	100	0	9	16	28	53	NA	NA	NA	NA	NA	NA	NA	NA	NA	NA	NA	NA	NA	NA	NA	NA	NA	NA	NA
594973	Illegio	28.5	1	0	1	0	0	0	0	0	0	1	0	0	0	0	0	0	0	1	1	6	4	22	85	0	20	22	22	64	NA	NA	NA	NA	NA	NA	NA	NA	NA	NA	NA	NA	NA	NA	NA	NA	NA	NA	NA
594975	Illegio	19.76	1	0	1	0	0	0	0	0	0	1	0	0	0	0	0	0	1	0	1	2	1	18	100	1	11	15	12	38	NA	NA	NA	NA	NA	NA	NA	NA	NA	NA	NA	NA	NA	NA	NA	NA	NA	NA	NA
594978	Illegio	18.77	1	0	1	0	0	0	0	0	0	0	0	0	0	0	0	0	0	0	0	1	0	18	100	1	16	11	13	40	NA	NA	NA	NA	NA	NA	NA	NA	NA	NA	NA	NA	NA	NA	NA	NA	NA	NA	NA
594981	Illegio	18.92	1	0	1	0	0	0	0	0	1	1	0	0	0	0	0	0	1	0	2	19	13	30	81	1	28	8	16	52	NA	NA	NA	NA	NA	NA	NA	NA	NA	NA	NA	NA	NA	NA	NA	NA	NA	NA	NA
594992	Illegio	16.48	1	0	1	0	0	0	0	0	0	1	0	0	0	0	0	0	1	0	1	8	5	25	98	0	24	11	16	51	NA	NA	NA	NA	NA	NA	NA	NA	NA	NA	NA	NA	NA	NA	NA	NA	NA	NA	NA
594994	Illegio	13.04	1	0	1	0	0	0	0	0	0	0	0	0	0	0	0	0	0	0	0	4	2	18	100	0	11	7	21	39	7	1	6	1	15	6	4	2	2	14	2	7	5	14	7	3	6	5	4
595005	Illegio	15.27	1	0	1	0	0	0	0	0	0	0	0	0	0	0	0	0	0	0	0	1	0	18	100	0	11	12	13	36	NA	NA	NA	NA	NA	NA	NA	NA	NA	NA	NA	NA	NA	NA	NA	NA	NA	NA	NA
598867	Resia	34.58	1	0	1	0	0	0	0	0	0	0	0	0	0	0	0	0	0	0	0	13	9	33	100	0	11	5	8	24	NA	NA	NA	NA	NA	NA	NA	NA	NA	NA	NA	NA	NA	NA	NA	NA	NA	NA	NA
598973	Resia	22.59	1	0	1	0	0	0	0	0	0	0	0	0	0	0	0	0	0	0	0	21	8	32	100	0	7	21	16	44	NA	NA	NA	NA	NA	NA	NA	NA	NA	NA	NA	NA	NA	NA	NA	NA	NA	NA	NA
599041	Resia	33.57	1	0	1	0	0	0	0	0	0	1	0	0	0	0	0	0	1	0	1	35	15	38	81	0	15	25	24	64	NA	NA	NA	NA	NA	NA	NA	NA	NA	NA	NA	NA	NA	NA	NA	NA	NA	NA	NA
599131	Resia	22.57	1	0	1	0	0	0	0	0	0	0	0	0	0	0	0	0	0	0	0	17	8	28	100	0	19	19	9	47	4	4	3	6	17	4	6	7	4	21	4	6	1	11	6	6	6	4	4
599140	Resia	13.14	1	0	1	0	0	0	0	0	0	0	0	0	0	0	0	0	0	0	0	3	1	20	100	0	9	8	11	28	8	0	2	4	14	4	6	3	3	16	6	7	4	17	5	6	6	4	4
599502	Resia	12.76	1	0	1	0	0	0	0	0	0	1	0	0	0	0	0	0	1	0	1	23	11	26	100	0	11	11	26	48	2	3	3	3	11	7	7	7	8	29	7	8	4	19	4	4	4	2	7
599527	Resia	47.75	1	0	1	0	0	0	0	0	0	0	0	0	0	0	0	0	0	0	0	2	0	18	89	0	12	5	16	33	2	6	4	0	12	1	5	2	4	12	5	3	2	10	3	7	6	5	10
582244	SanMartino	30.45	1	0	1	1	0	0	0	0	0	0	0	0	0	0	0	0	0	0	0	3	0	20	81	0	11	10	25	46	6	4	5	7	22	3	6	3	2	14	6	2	2	10	3	6	3	3	3
591530	Clauzetto	26.17	1	0	1	1	0	0	0	0	0	1	0	0	0	0	0	0	1	0	2	5	NA	36	85	1	19	13	14	46	NA	NA	NA	NA	NA	NA	NA	NA	NA	NA	NA	NA	NA	NA	NA	NA	NA	NA	NA
591542	Clauzetto	23.08	1	0	1	1	0	0	0	0	0	0	0	0	0	0	0	0	0	0	0	1	NA	18	100	0	17	21	16	54	NA	NA	NA	NA	NA	NA	NA	NA	NA	NA	NA	NA	NA	NA	NA	NA	NA	NA	NA
591611	Sauris	9.72	1	0	1	1	0	0	0	0	NA	0	0	0	0	0	0	0	0	NA	0	5	8	24	90	0	25	17	26	68	NA	NA	NA	NA	NA	NA	NA	NA	NA	NA	NA	NA	NA	NA	NA	NA	NA	NA	NA
591612	Sauris	14.68	1	0	1	1	0	0	0	0	NA	1	0	0	0	0	0	0	1	NA	3	11	10	24	65	0	26	18	19	63	6	3	2	3	14	8	6	6	4	24	8	4	1	13	4	1	4	0	6
591619	Sauris	20.55	1	0	1	1	0	0	0	0	NA	1	0	0	0	0	0	0	1	NA	2	3	2	20	95	0	32	13	26	71	2	8	6	3	19	7	6	8	6	27	4	1	2	7	3	4	0	0	2
591638	Sauris	20.57	1	0	1	1	0	0	0	0	NA	1	0	0	0	0	1	0	0	NA	1	7	6	23	98	0	28	14	19	61	NA	NA	NA	NA	NA	NA	NA	NA	NA	NA	NA	NA	NA	NA	NA	NA	NA	NA	NA
594929	Illegio	31.88	1	0	1	1	0	0	0	0	0	0	0	0	0	0	0	0	0	0	0	0	2	18	98	0	21	20	16	57	NA	NA	NA	NA	NA	NA	NA	NA	NA	NA	NA	NA	NA	NA	NA	NA	NA	NA	NA
599523	Resia	60.27	1	0	1	1	0	0	0	0	1	0	0	0	0	0	0	0	0	0	0	4	6	18	75	0	21	18	29	68	5	6	4	4	19	7	5	3	7	22	5	3	2	10	2	5	5	2	7
594961	Illegio	23.13	1	0	1	0	1	0	0	0	0	0	0	0	0	0	0	0	0	0	0	4	2	18	98	0	27	17	20	64	4	4	1	NA	NA	5	6	7	7	25	8	2	3	13	2	8	7	3	8
582152	ERTO	48.42	1	1	1	0	0	0	0	0	0	0	0	0	0	0	0	0	0	0	0	29	13	31	95	0	24	18	28	70	NA	NA	NA	NA	NA	NA	NA	NA	NA	NA	NA	NA	NA	NA	NA	NA	NA	NA	NA
590591	Clauzetto	18.41	1	1	1	0	0	0	0	0	0	0	0	0	0	0	0	0	0	0	0	27	16	29	85	0	16	9	14	39	9	2	5	9	25	9	7	7	7	30	9	7	6	22	2	2	1	0	8
591610	Sauris	16.84	1	1	1	0	0	0	0	0	NA	1	0	0	0	0	0	0	1	NA	1	15	12	30	81	0	31	22	16	69	NA	NA	NA	NA	NA	NA	NA	NA	NA	NA	NA	NA	NA	NA	NA	NA	NA	NA	NA
591641	Sauris	38.74	1	1	1	0	0	0	0	0	NA	1	0	0	0	0	0	0	0	NA	1	16	19	31	61	0	31	23	21	75	1	8	2	1	12	8	5	7	5	25	4	1	1	6	7	4	4	2	6
591655	Sauris	3.7	1	1	1	0	0	0	0	0	NA	0	0	0	0	0	0	0	0	NA	1	2	1	18	100	0	21	23	19	63	9	8	6	3	26	1	4	4	3	12	3	3	5	11	1	7	3	3	7
593570	Resia	3.8	1	1	1	0	0	0	0	0	0	1	0	0	0	0	0	0	1	0	2	6	3	26	70	0	19	9	22	50	7	6	3	3	19	4	4	5	6	19	9	1	2	12	7	7	3	2	3
593652	Resia	42.94	1	1	1	0	0	0	0	1	0	1	0	0	0	0	0	0	1	0	0	24	22	37	55	1	17	22	20	59	NA	NA	NA	NA	NA	NA	NA	NA	NA	NA	NA	NA	NA	NA	NA	NA	NA	NA	NA
594848	Illegio	21.27	1	1	1	0	0	0	0	0	0	0	0	0	0	0	0	0	0	0	0	15	11	26	85	0	12	5	21	38	NA	NA	NA	NA	NA	NA	NA	NA	NA	NA	NA	NA	NA	NA	NA	NA	NA	NA	NA
594983	Illegio	28.76	1	1	1	0	0	0	0	0	0	1	1	0	0	0	0	0	0	0	1	14	8	28	90	0	25	19	26	70	6	3	4	2	15	5	7	5	4	21	5	2	4	11	1	NA	5	3	6
599087	Resia	22.29	1	1	1	0	0	0	0	0	0	1	0	0	0	0	0	0	1	0	1	12	8	29	65	1	10	9	10	29	NA	NA	NA	NA	NA	NA	NA	NA	NA	NA	NA	NA	NA	NA	NA	NA	NA	NA	NA
599093	Resia	20.02	1	1	1	0	0	0	0	0	0	1	0	0	0	0	0	0	1	0	1	8	5	32	81	1	14	5	33	52	NA	NA	NA	NA	NA	NA	NA	NA	NA	NA	NA	NA	NA	NA	NA	NA	NA	NA	NA
599152	Sauris	20.8	1	1	1	0	0	0	0	0	NA	1	0	0	0	0	0	0	1	NA	1	7	11	26	60	0	17	7	16	40	7	4	4	3	18	7	5	6	3	21	8	3	4	15	5	5	6	5	7
591631	Sauris	22.57	1	1	1	1	0	0	0	0	NA	1	0	0	0	0	1	0	0	NA	1	14	10	25	90	0	24	24	22	70	NA	NA	NA	NA	NA	NA	NA	NA	NA	NA	NA	NA	NA	NA	NA	NA	NA	NA	NA
591646	Sauris	22.63	1	1	1	1	0	0	0	0	NA	1	1	0	0	0	1	0	1	NA	3	19	11	34	51	0	23	12	24	59	4	3	3	3	13	11	6	8	6	31	8	2	1	11	4	3	1	2	7
599085	Resia	39.94	1	1	1	1	0	0	0	0	1	0	0	0	0	0	0	0	0	0	0	13	11	34	51	0	15	21	20	56	NA	NA	NA	NA	NA	NA	NA	NA	NA	NA	NA	NA	NA	NA	NA	NA	NA	NA	NA
594866	Illegio	28.68	1	1	1	0	1	0	0	0	0	0	0	0	0	0	0	0	0	0	0	12	8	26	88	0	25	12	19	56	NA	NA	NA	NA	NA	NA	NA	NA	NA	NA	NA	NA	NA	NA	NA	NA	NA	NA	NA
582159	ERTO	51.31	1	0	0	0	0	1	0	0	0	0	0	0	0	0	0	0	0	0	0	0	0	18	100	0	17	21	20	58	1	4	4	1	10	5	3	5	4	17	7	3	5	15	5	7	7	4	8
582217	SanMartino	32.73	1	0	0	0	0	1	0	1	0	0	0	0	0	0	0	0	0	0	0	36	23	40	71	0	17	15	8	40	5	7	2	3	17	3	5	6	6	20	6	3	3	12	5	6	8	5	8
582242	SanMartino	44	1	0	0	0	0	1	0	0	0	0	0	0	0	0	0	0	0	0	0	9	11	28	61	1	15	8	13	36	8	5	7	1	21	6	7	4	4	21	7	5	3	15	5	5	3	4	7
582253	SanMartino	24.02	1	0	0	0	0	1	0	0	0	1	1	0	0	0	0	0	0	0	1	17	9	24	60	0	16	14	12	42	11	1	6	5	23	3	6	2	4	15	9	6	3	18	7	6	5	5	6
582272	SanMartino	40.27	1	0	0	0	0	1	0	0	0	0	0	0	0	0	0	0	0	0	0	8	7	28	71	1	20	17	20	57	4	5	4	3	16	6	5	3	5	19	5	3	4	12	6	6	5	3	8
590451	Clauzetto	19.72	1	0	0	0	0	1	0	0	0	1	0	0	0	0	0	0	1	1	8	29	19	29	80	0	19	15	18	52	6	6	6	8	26	10	4	4	8	26	6	2	1	9	5	0	1	3	7
590500	Clauzetto	31.45	1	0	0	0	0	1	0	0	0	0	0	0	0	0	0	0	0	0	0	23	12	31	100	0	17	15	14	46	NA	NA	NA	NA	NA	NA	NA	NA	NA	NA	NA	NA	NA	NA	NA	NA	NA	NA	NA
590502	Clauzetto	24.92	1	0	0	0	0	1	0	1	0	1	0	0	0	0	0	0	1	0	4	36	33	45	70	1	11	16	13	40	4	5	5	3	17	10	6	6	9	31	8	3	4	15	7	4	4	4	6
590547	Clauzetto	42.72	1	0	0	0	0	1	0	1	0	0	0	0	0	0	0	0	0	0	0	34	28	44	50	1	11	17	14	42	3	7	6	4	20	6	6	6	7	25	5	2	2	9	2	6	3	0	7
591615	Sauris	25.27	1	0	0	0	0	1	0	0	NA	0	0	0	0	0	0	0	0	NA	0	1	1	18	80	0	10	10	21	41	NA	NA	NA	NA	NA	NA	NA	NA	NA	NA	NA	NA	NA	NA	NA	NA	NA	NA	NA
593606	Resia	30.34	1	0	0	0	0	1	0	0	0	0	0	0	0	0	0	0	0	0	0	12	9	21	55	1	19	9	16	44	NA	NA	NA	NA	NA	NA	NA	NA	NA	NA	NA	NA	NA	NA	NA	NA	NA	NA	NA
599035	Resia	21.18	1	0	0	0	0	1	0	0	0	0	0	0	0	0	0	0	0	0	0	0	2	20	100	0	11	13	23	47	NA	NA	NA	NA	NA	NA	NA	NA	NA	NA	NA	NA	NA	NA	NA	NA	NA	NA	NA
599375	Resia	24.12	1	0	0	0	0	1	0	0	0	0	0	0	0	0	0	0	0	0	0	23	12	33	85	0	11	5	16	32	NA	NA	NA	NA	NA	NA	NA	NA	NA	NA	NA	NA	NA	NA	NA	NA	NA	NA	NA
599384	Resia	11.53	1	0	0	0	0	1	0	0	1	0	0	0	0	0	0	0	0	0	0	11	7	27	75	0	8	5	11	24	7	3	2	4	16	3	6	2	3	14	8	6	1	15	6	7	6	5	9
590453	Clauzetto	40.15	1	0	0	0	1	1	0	0	0	0	0	0	0	0	0	0	0	0	0	21	13	26	95	0	12	5	23	40	NA	NA	NA	NA	NA	NA	NA	NA	NA	NA	NA	NA	NA	NA	NA	NA	NA	NA	NA
582006	SanMartino	34.84	1	1	0	0	0	1	0	1	0	0	0	0	0	0	0	0	0	0	0	44	39	40	61	0	19	22	18	59	3	3	3	3	12	7	6	6	4	23	9	4	4	17	8	2	5	4	8
582125	ERTO	8.87	1	1	0	0	0	1	0	1	0	1	0	0	0	0	0	0	1	0	3	17	14	28	61	0	16	11	19	46	NA	NA	NA	NA	NA	NA	NA	NA	NA	NA	NA	NA	NA	NA	NA	NA	NA	NA	NA
590526	Clauzetto	18.76	1	1	0	0	0	1	0	0	0	1	0	1	0	0	0	0	1	0	1	13	NA	29	92	1	21	13	8	42	NA	NA	NA	NA	NA	NA	NA	NA	NA	NA	NA	NA	NA	NA	NA	NA	NA	NA	NA
593507	ERTO	34.67	1	1	0	0	0	1	0	0	0	1	0	0	0	0	0	0	1	0	2	14	22	26	61	0	22	15	23	60	NA	NA	NA	NA	NA	NA	NA	NA	NA	NA	NA	NA	NA	NA	NA	NA	NA	NA	NA
593525	ERTO	20.94	1	1	0	0	0	1	0	0	0	0	0	0	0	0	0	0	0	0	0	0	0	18	100	0	15	16	15	46	7	2	7	6	22	2	4	2	5	13	7	2	6	15	4	8	2	4	0
593581	Resia	14.6	1	1	0	0	0	1	0	0	0	1	0	0	0	0	0	0	1	0	2	14	12	34	61	0	19	21	8	48	9	6	5	4	24	1	4	1	3	9	6	4	3	13	3	6	5	5	6
594859	Illegio	15.74	1	1	0	0	0	1	0	1	0	0	0	0	0	0	0	0	0	0	0	25	18	41	71	0	29	20	26	75	NA	NA	NA	NA	NA	NA	NA	NA	NA	NA	NA	NA	NA	NA	NA	NA	NA	NA	NA
594868	Illegio	41.76	1	1	0	0	0	1	0	0	0	0	0	0	0	0	0	0	0	0	0	11	7	29	81	0	25	20	29	74	NA	NA	NA	NA	NA	NA	NA	NA	NA	NA	NA	NA	NA	NA	NA	NA	NA	NA	NA
595028	Illegio	18.84	1	1	0	0	0	1	0	0	0	1	0	0	0	0	0	0	1	0	2	26	28	30	75	0	14	8	13	35	7	0	4	4	15	7	7	4	5	23	9	8	6	23	6	3	7	2	4
599166	Sauris	46.54	1	1	0	0	0	1	0	0	NA	1	0	0	0	0	0	0	1	NA	1	3	0	23	85	0	15	16	21	52	2	3	4	2	11	7	7	8	4	26	6	5	6	17	4	7	4	2	10
599366	Resia	31.39	1	1	0	0	0	1	0	0	0	0	0	0	0	0	0	0	0	0	0	25	20	40	75	0	7	9	16	32	NA	NA	NA	NA	NA	NA	NA	NA	NA	NA	NA	NA	NA	NA	NA	NA	NA	NA	NA
582294	SanMartino	41.44	1	0	1	0	0	1	0	0	0	0	0	0	0	0	0	0	0	0	0	8	6	24	88	0	16	17	19	52	7	2	2	2	13	4	5	4	2	15	7	7	4	18	4	6	4	2	2
590540	Clauzetto	35.76	1	0	1	0	0	1	0	0	0	0	0	0	0	0	0	0	0	0	0	30	14	37	100	0	26	16	12	54	9	0	6	1	16	3	4	3	2	12	10	8	4	22	5	6	8	5	7
591563	Clauzetto	33.46	1	0	1	0	0	1	0	0	0	0	0	0	0	0	0	0	0	0	0	3	NA	18	100	1	13	7	19	39	NA	NA	NA	NA	NA	NA	NA	NA	NA	NA	NA	NA	NA	NA	NA	NA	NA	NA	NA
593661	Resia	30.52	1	0	1	0	0	1	0	0	0	1	0	0	0	0	0	0	1	0	1	35	15	40	61	0	13	9	30	52	NA	NA	NA	NA	NA	NA	NA	NA	NA	NA	NA	NA	NA	NA	NA	NA	NA	NA	NA
593700	Resia	16.81	1	0	1	0	0	1	0	0	0	0	0	0	0	0	0	0	0	0	0	2	0	18	60	0	30	16	24	70	NA	NA	NA	NA	NA	NA	NA	NA	NA	NA	NA	NA	NA	NA	NA	NA	NA	NA	NA
594956	Illegio	25.12	1	0	1	0	0	1	0	0	0	1	0	0	0	0	0	0	1	0	2	12	9	26	82	0	25	23	24	72	NA	NA	NA	NA	NA	NA	NA	NA	NA	NA	NA	NA	NA	NA	NA	NA	NA	NA	NA
582123	ERTO	31.57	1	0	1	0	1	1	0	0	1	1	0	1	0	1	1	0	0	1	3	26	10	30	92	0	34	14	20	68	NA	NA	NA	NA	NA	NA	NA	NA	NA	NA	NA	NA	NA	NA	NA	NA	NA	NA	NA
582145	ERTO	38.65	1	1	1	0	0	1	0	0	0	1	0	0	0	0	0	0	1	0	1	9	4	25	82	0	NA	16	14	NA	5	2	3	4	14	6	6	3	7	22	10	2	4	16	7	5	2	3	8
591622	Sauris	15.61	1	1	1	0	0	1	0	0	NA	1	0	0	0	0	0	0	1	NA	1	14	10	30	89	0	25	25	11	61	7	1	4	4	16	9	5	6	7	27	10	3	4	17	7	6	2	2	3
593629	Resia	7.37	1	1	1	0	0	1	0	0	0	0	0	0	0	0	0	0	0	0	0	5	5	25	85	1	20	11	26	57	NA	NA	NA	NA	NA	NA	NA	NA	NA	NA	NA	NA	NA	NA	NA	NA	NA	NA	NA
594875	Illegio	25.02	1	1	1	0	0	1	0	0	0	0	0	0	0	0	0	0	0	0	0	23	5	18	80	0	14	8	22	44	NA	NA	NA	NA	NA	NA	NA	NA	NA	NA	NA	NA	NA	NA	NA	NA	NA	NA	NA
[truncated: 14 more columns]
